# Supplementary material for: Design of an aryne-platform for the synthesis of non-racemic heterocyclic allocolchicinoids
Source: Royal Society of Chemistry journal article supplement (doi:10.1039/d3ob00827d), 2023-01-01
Supplement: d3ob00827d1.pdf [file d3ob00827d1.pdf]

# **SUPPORTING INFORMATION**

**for**

## **Design of an Aryne-Platform for the Synthesis of Heterocyclic Allocolchicinoids**

Iuliia A. Gracheva,<sup>a</sup> Hans-Günther Schmalz,<sup>b</sup> Elena V. Svirshchevskaya,<sup>a,c</sup> Ekaterina S. Shchegravina<sup>a</sup>  
and Alexey Yu. Fedorov<sup>\*a</sup>

<sup>a</sup> Department of Organic Chemistry, National Research Lobachevsky State University of Nizhny Novgorod, 23 Gagarin Avenue, 603950 Nizhny Novgorod, Russian Federation.

<sup>b</sup> Department of Chemistry, University of Cologne, Greinstrasse 4, 50939 Cologne, Germany.

<sup>c</sup> Laboratory of Cell Interactions, Shemyakin-Ovchinnikov Institute of Bioorganic Chemistry RAS, 16/10 Miklukho-Maklaya Street, 117997 Moscow, Russian Federation.

\* [afedorovnn@yandex.ru](mailto:afedorovnn@yandex.ru)

**(5*S*,11*aR*)-5-(*N*-(*tert*-Butoxycarbonyl)acetamido)-9,10,11-trimethoxy-6,7-dihydro-5*H*-dibenzo[*a,c*]cycloheptene-3-yl trifluoromethanesulfonate (6)**

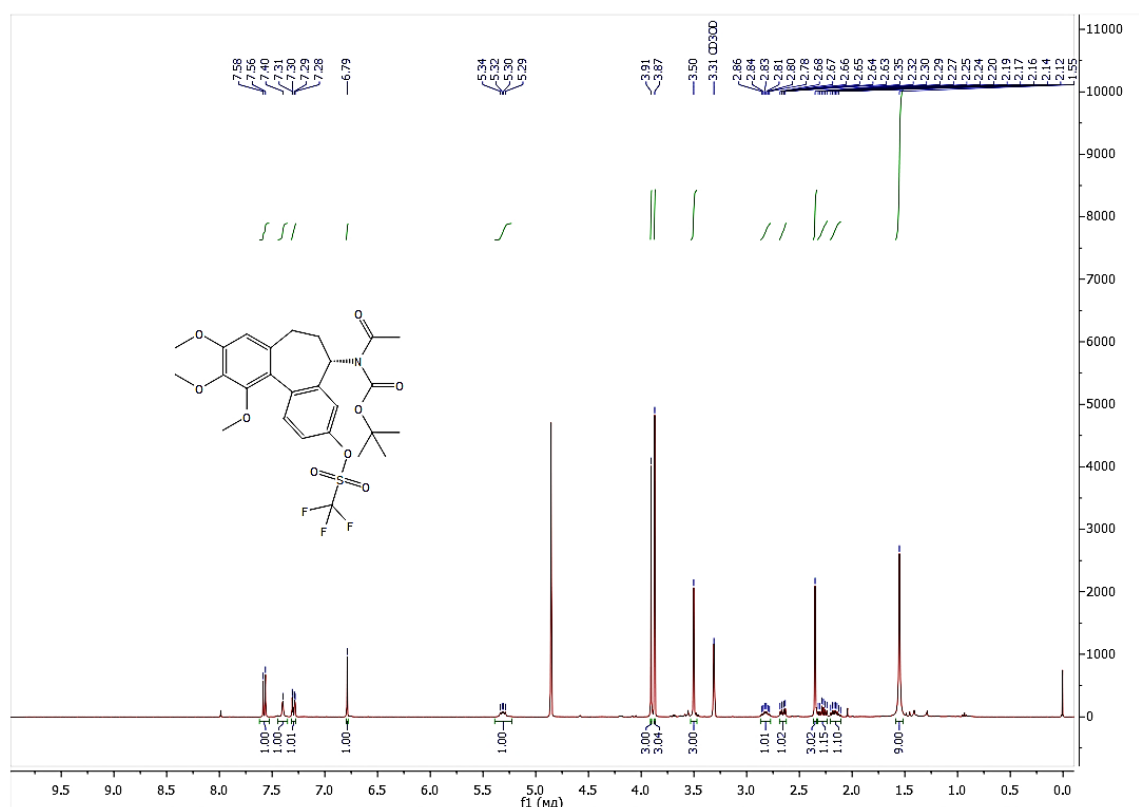

Figure S1. <sup>1</sup>H NMR (400 MHz, CD<sub>3</sub>OD) spectrum of compound 6

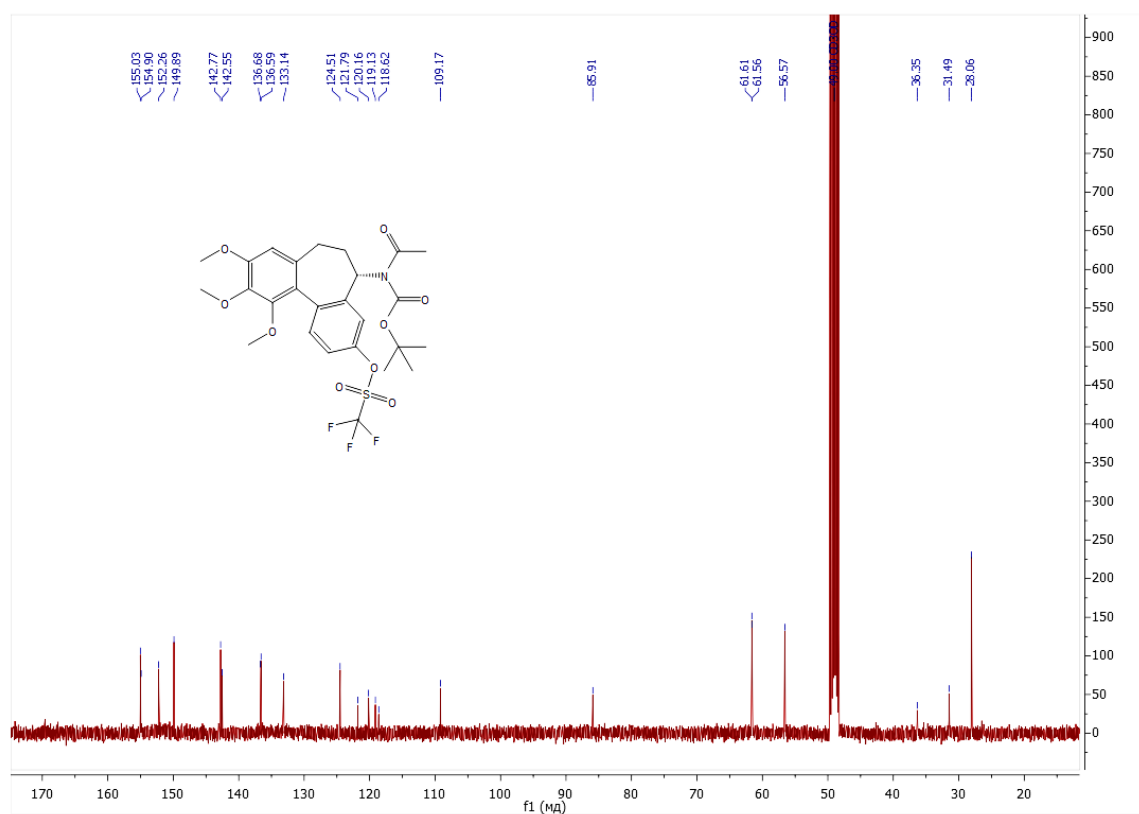

Figure S2. <sup>13</sup>C NMR (400 MHz, CD<sub>3</sub>OD) spectrum of compound 6

**(5*S*,11*aR*)-5-Acetamido-2-iodo-9,10,11-trimethoxy-6,7-dihydro-5*H*-dibenzo[*a,c*]cycloheptene-3-yl trifluoromethanesulfonate (**7a**)**

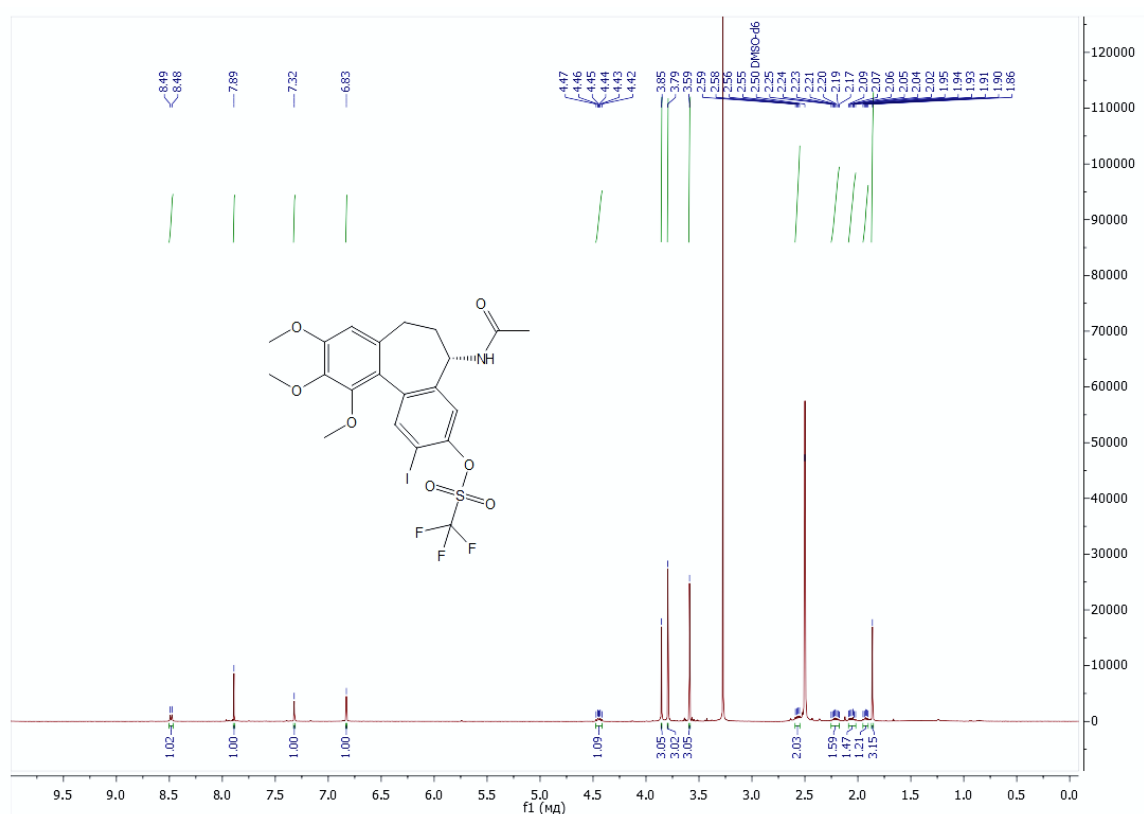

Figure S3. <sup>1</sup>H NMR (500 MHz, DMSO-*d*<sub>6</sub>) spectrum of compound **7a**

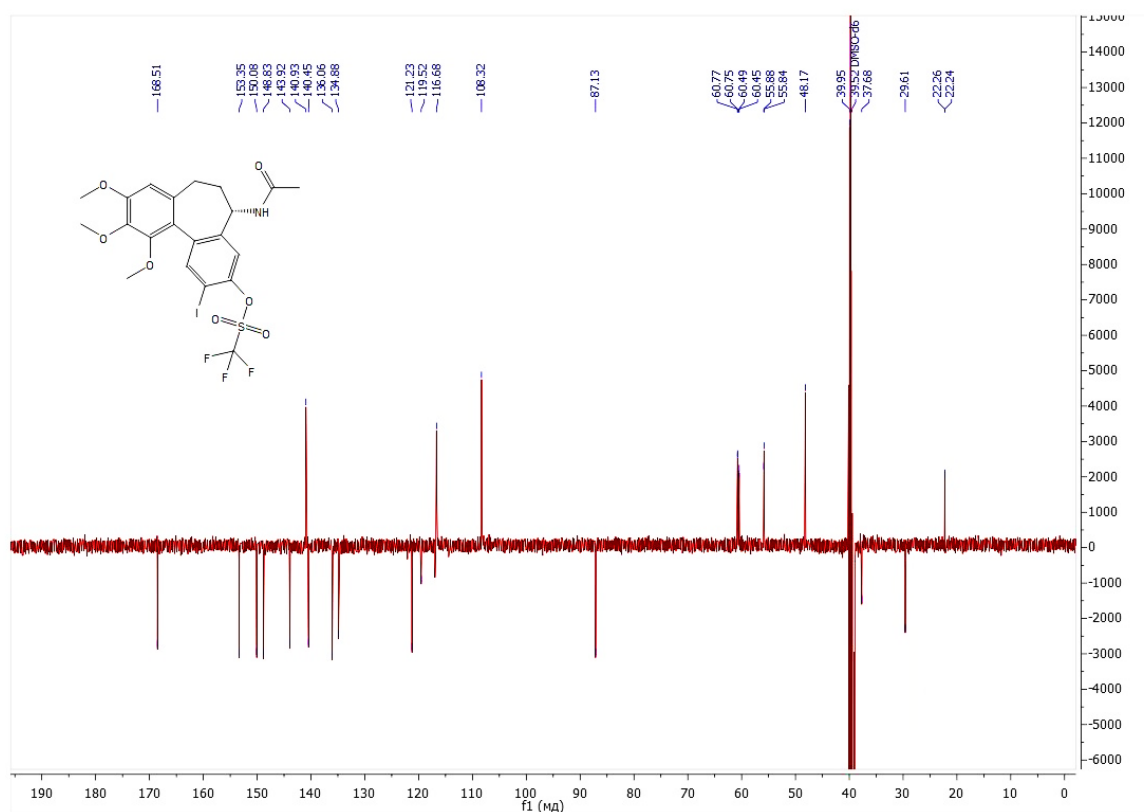

Figure S4. <sup>13</sup>C NMR (126 MHz, DMSO-*d*<sub>6</sub>) spectrum of compound **7a**

**(5S)-5-Acetamido-2-iodo-9,10,11-trimethoxy-6,7-dihydro-5H-dibenzo[a,c]cyclohepten-3-yl 4-methylbenzenesulfonate (7b)**

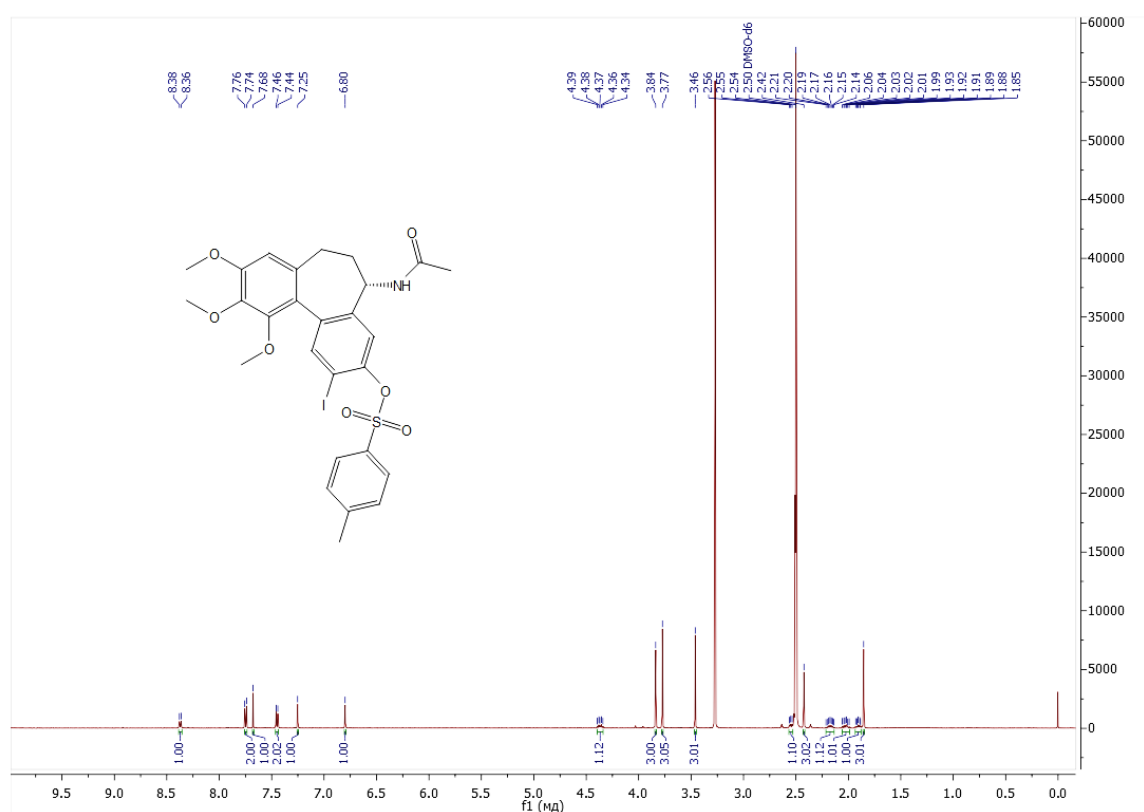

Figure S5. <sup>1</sup>H NMR (500 MHz, DMSO-*d*<sub>6</sub>) spectrum of compound **7b**

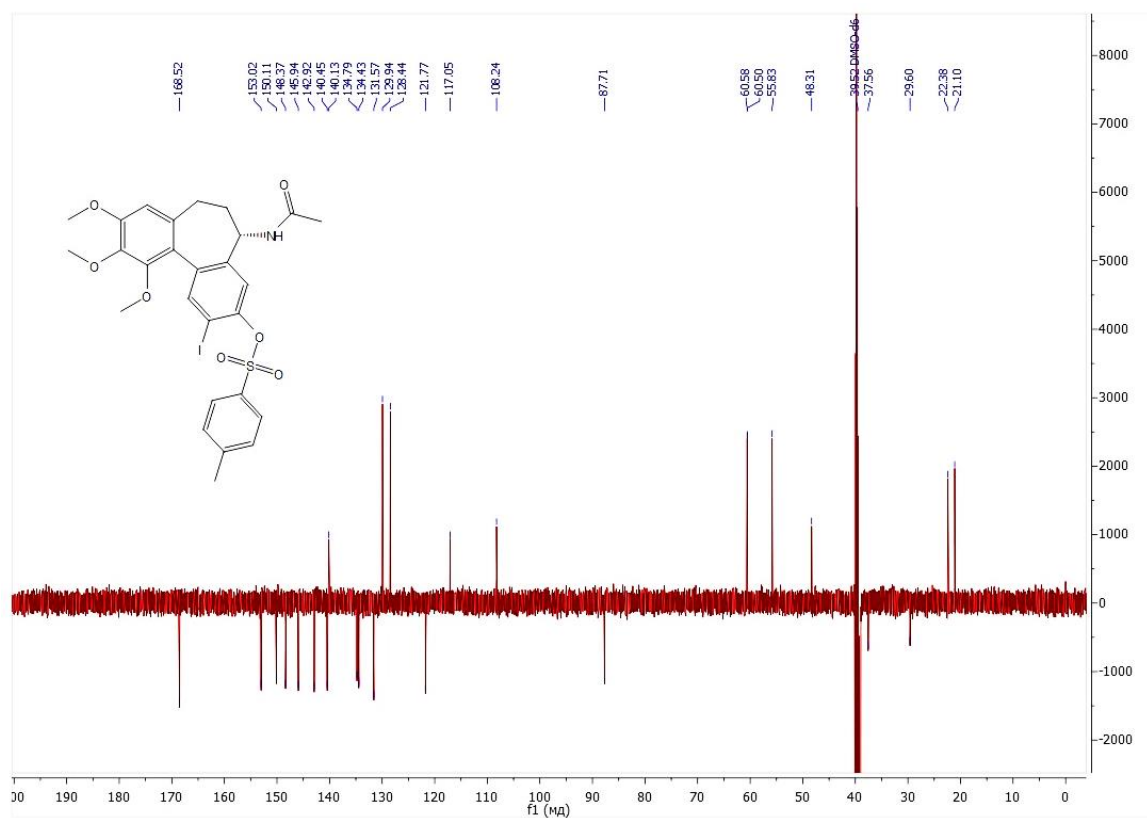

Figure S6. <sup>13</sup>C NMR (126 MHz, DMSO-*d*<sub>6</sub>) spectrum of compound **7b**

***N*-((7*S*,13*bR*)-1,2,3,9-Tetramethoxy-6,7,9,12-tetrahydro-5*H*-9,12-epoxybenzo[3,4]cyclohepta[1,2-*b*]naphthalen-7-yl)acetamide (8')** and ***N*-((7*S*,13*bR*)-1,2,3,12-tetramethoxy-6,7,9,12-tetrahydro-5*H*-9,12-epoxybenzo[3,4]cyclohepta[1,2-*b*]naphthalen-7-yl)acetamide (8'')** isomers

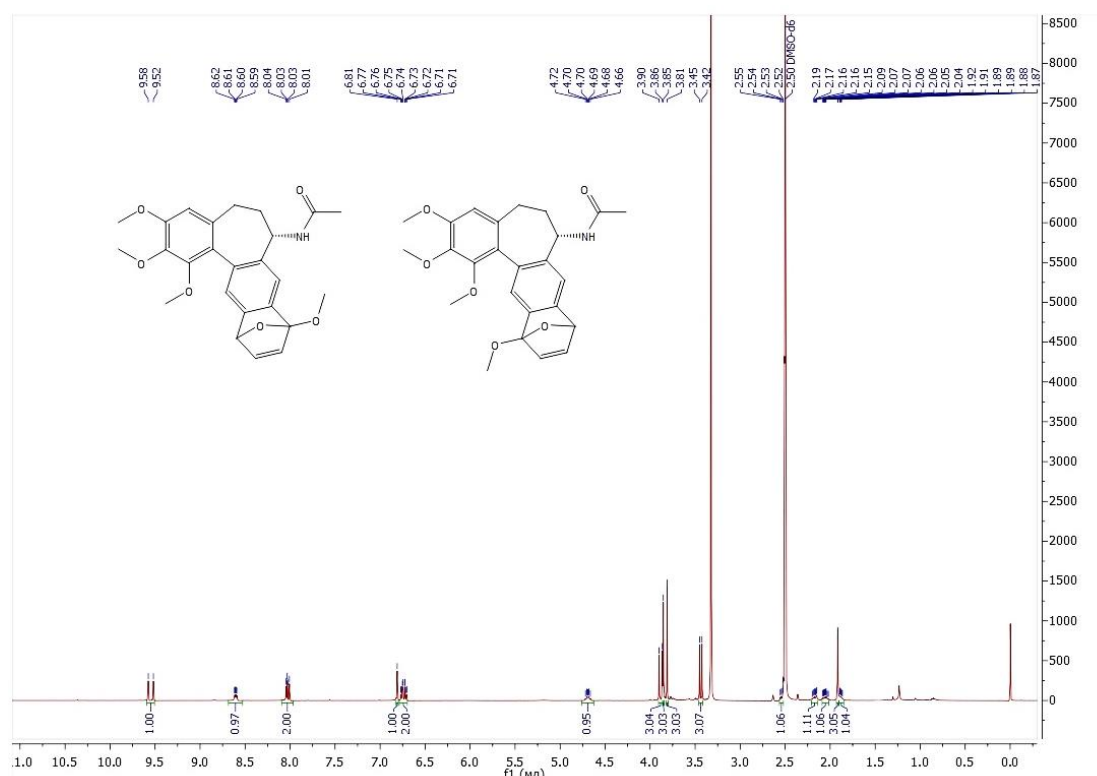

Figure S7.  $^1\text{H}$  NMR (500 MHz,  $\text{DMSO-}d_6$ ) spectrum of compounds **8**

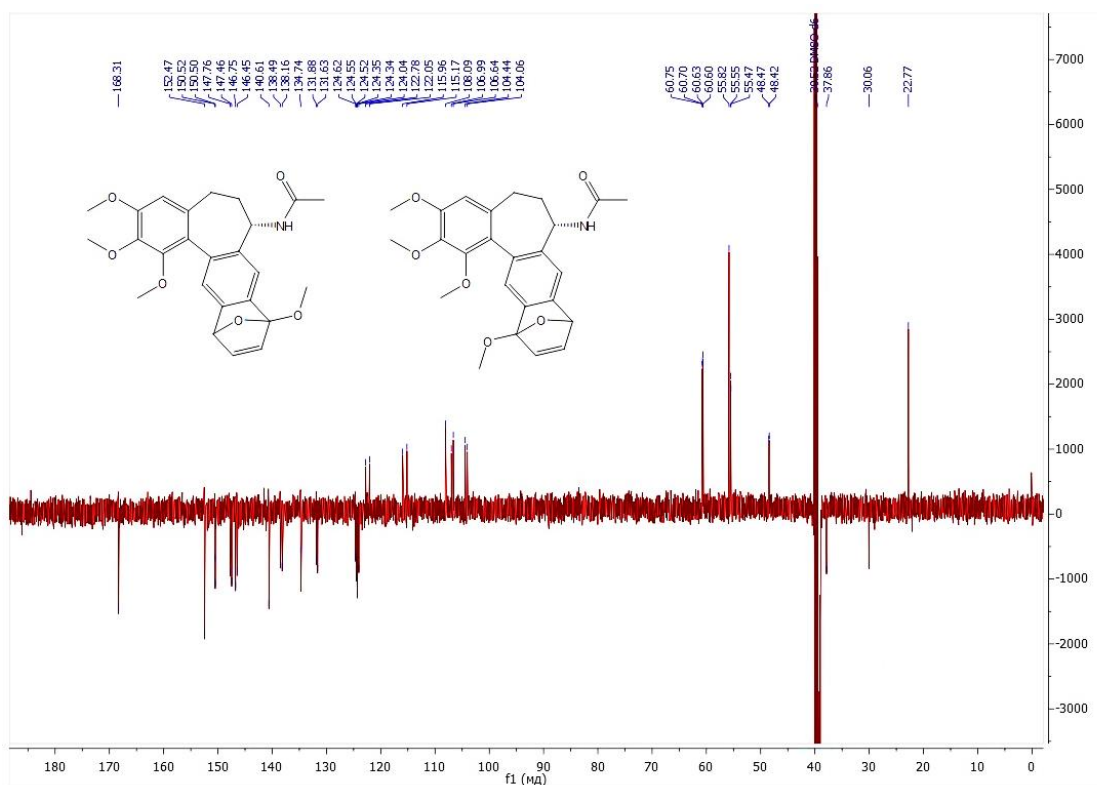

Figure S8.  $^{13}\text{C}$  NMR (126 MHz,  $\text{DMSO-}d_6$ ) spectrum of compounds **8**

***N*-((5*S*)-3-Hydroxy-2-iodo-9,10,11-trimethoxy-6,7-dihydro-5*H*-dibenzo[*a,c*]cyclohepten-5-yl)-2-(trimethylsilyl)acetamide (10)**

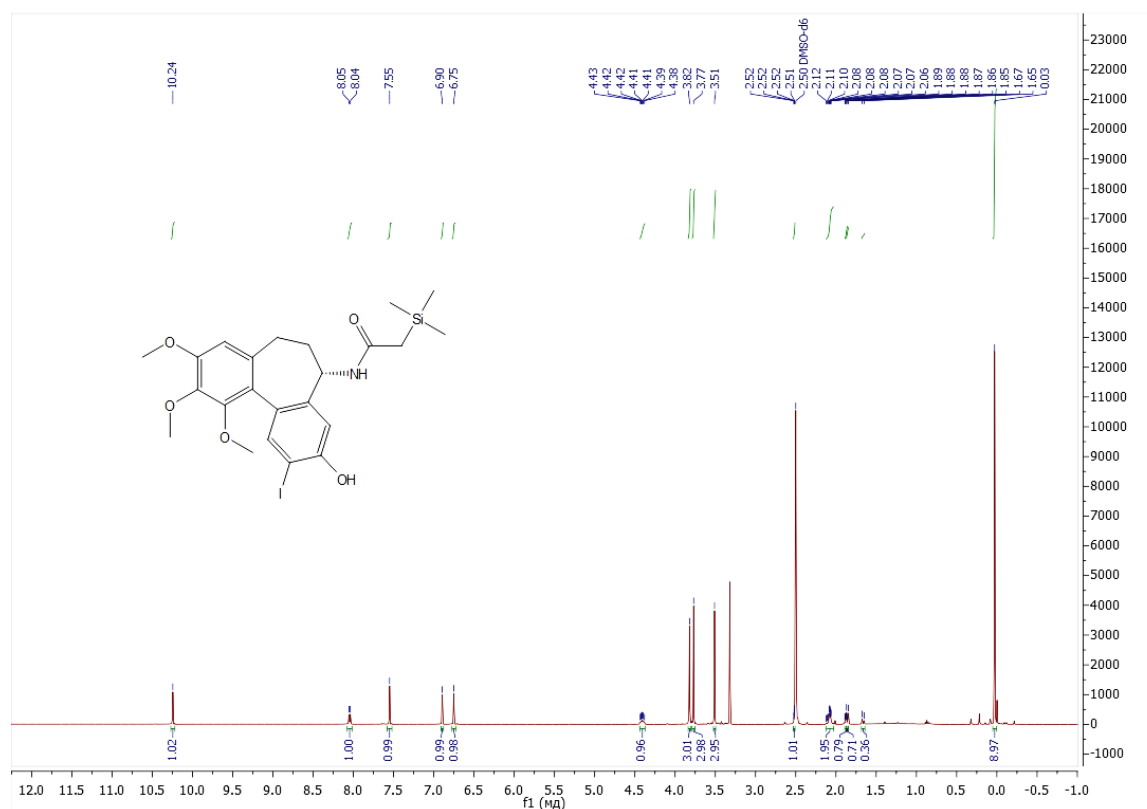

Figure S9.  $^1\text{H}$  NMR (500 MHz,  $\text{DMSO}-d_6$ ) spectrum of compound **10**

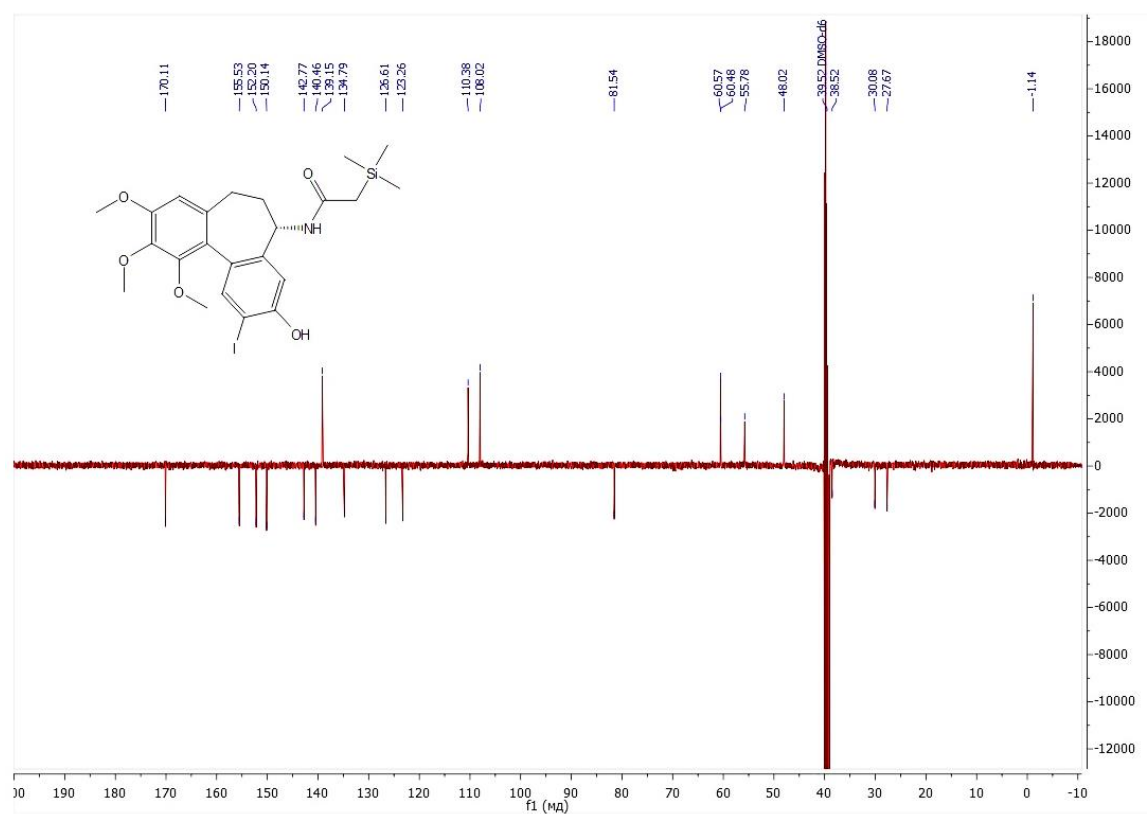

Figure S10.  $^{13}\text{C}$  NMR (126 MHz,  $\text{DMSO}-d_6$ ) spectrum of compound **10**

***N*-((5*S*,11*aR*)-2-iodo-9,10,11-trimethoxy-3-((triethylsilyl)oxy)-6,7-dihydro-5*H*-dibenzo[*a,c*]cyclohepten-5-yl)acetamide (**11**)**

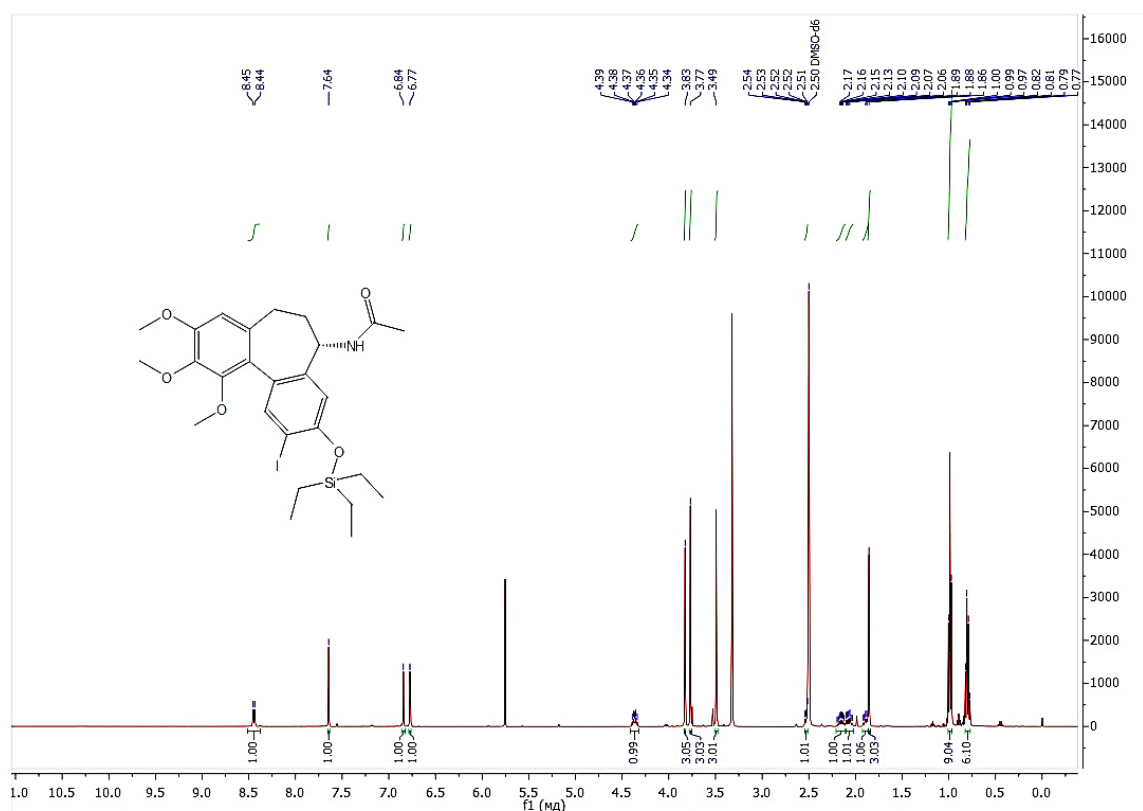

Figure S11. <sup>1</sup>H NMR (500 MHz, DMSO-*d*<sub>6</sub>) spectrum of compound **11**

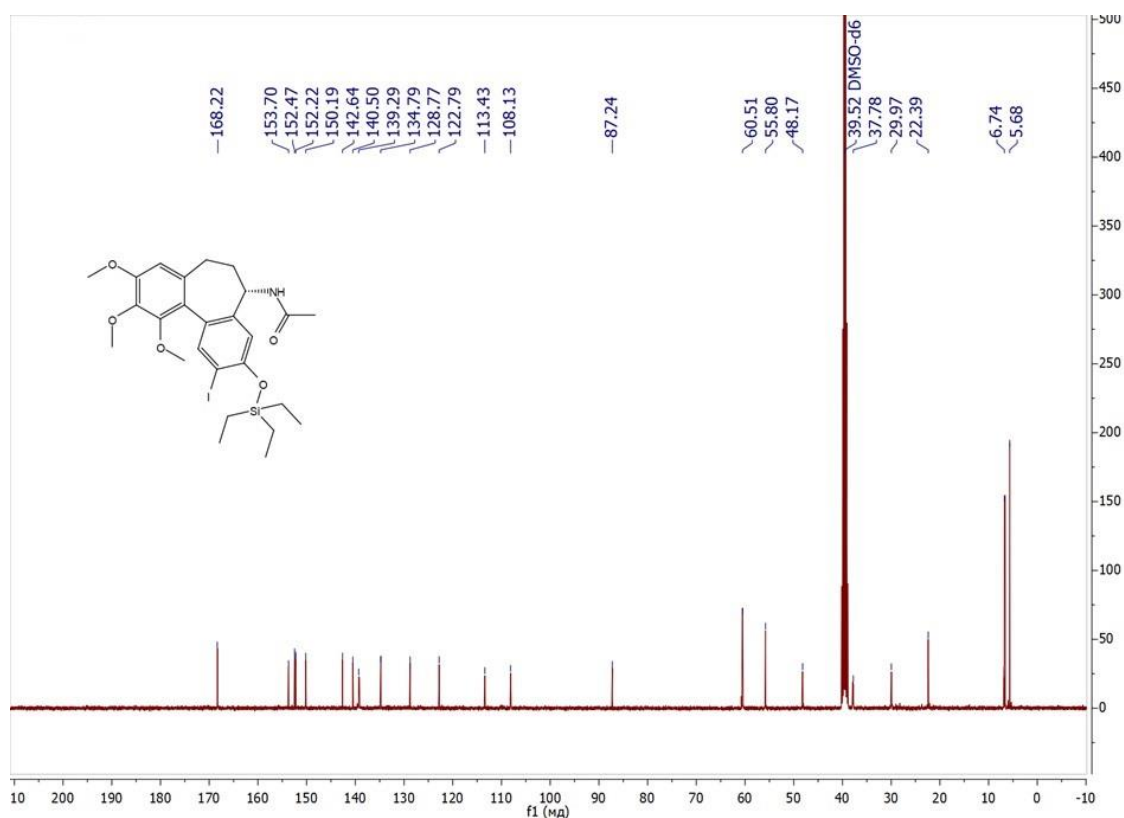

Figure S12. <sup>13</sup>C NMR (400 MHz, DMSO-*d*<sub>6</sub>) spectrum of compound **11**

***N*-((5*S*,11*aR*)-3-((*tert*-Butyldimethylsilyl)oxy)-2-iodo-9,10,11-trimethoxy-6,7-dihydro-5*H*-dibenzo[*a,c*]cyclohepten-5-yl)acetamide (**12**)**

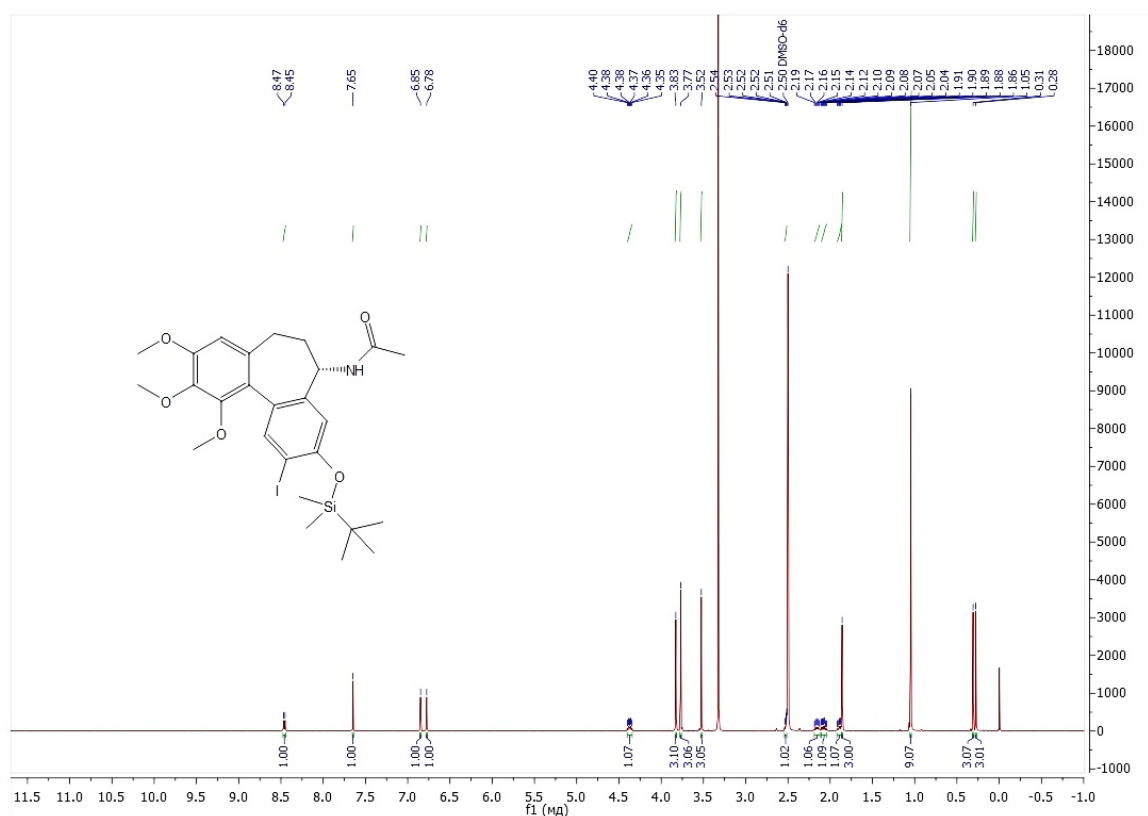

Figure S13. <sup>1</sup>H NMR (500 MHz, DMSO-*d*<sub>6</sub>) spectrum of compound **12**

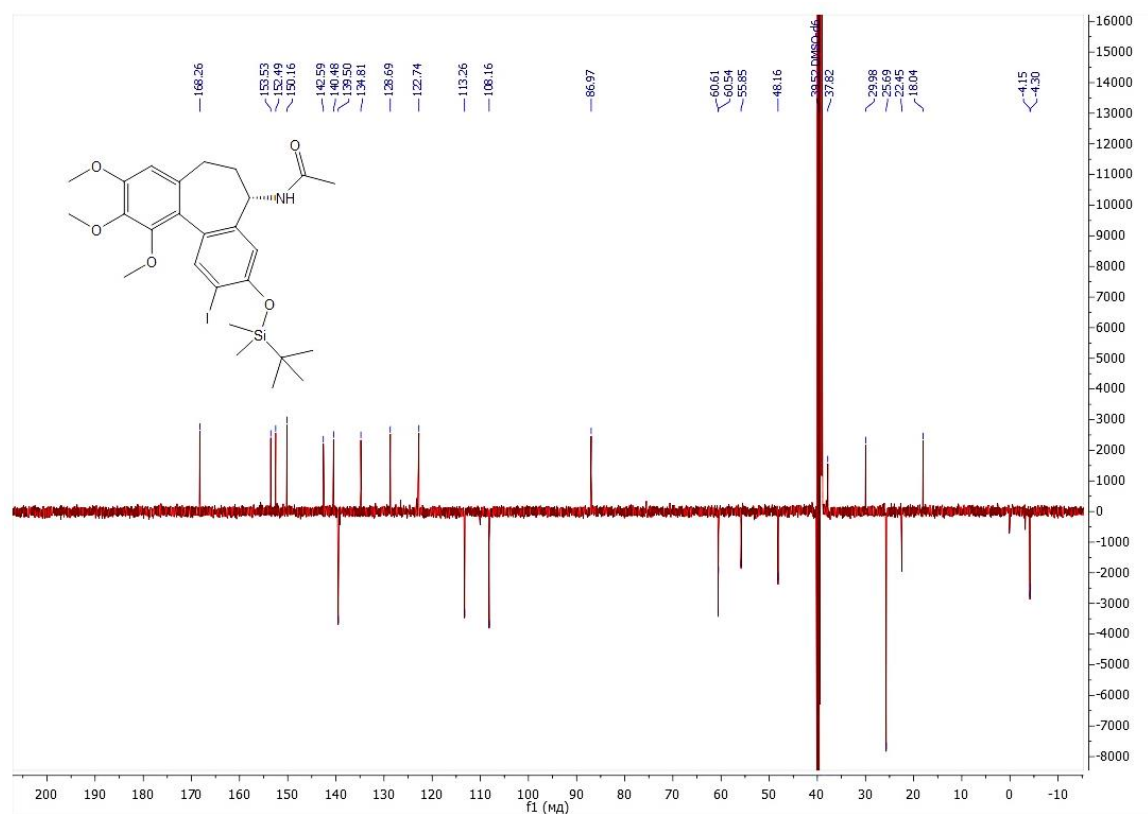

Figure S14. <sup>13</sup>C NMR (126 MHz, DMSO-*d*<sub>6</sub>) spectrum of compound **12**



***N*-((5*S*,11*aR*)-3-Hydroxy-2-iodo-9,10,11-trimethoxy-6,7-dihydro-5*H*-dibenzo[*a,c*]cyclohepten-5-yl)-*N*-(triethylsilyl)acetamide (**13**)**

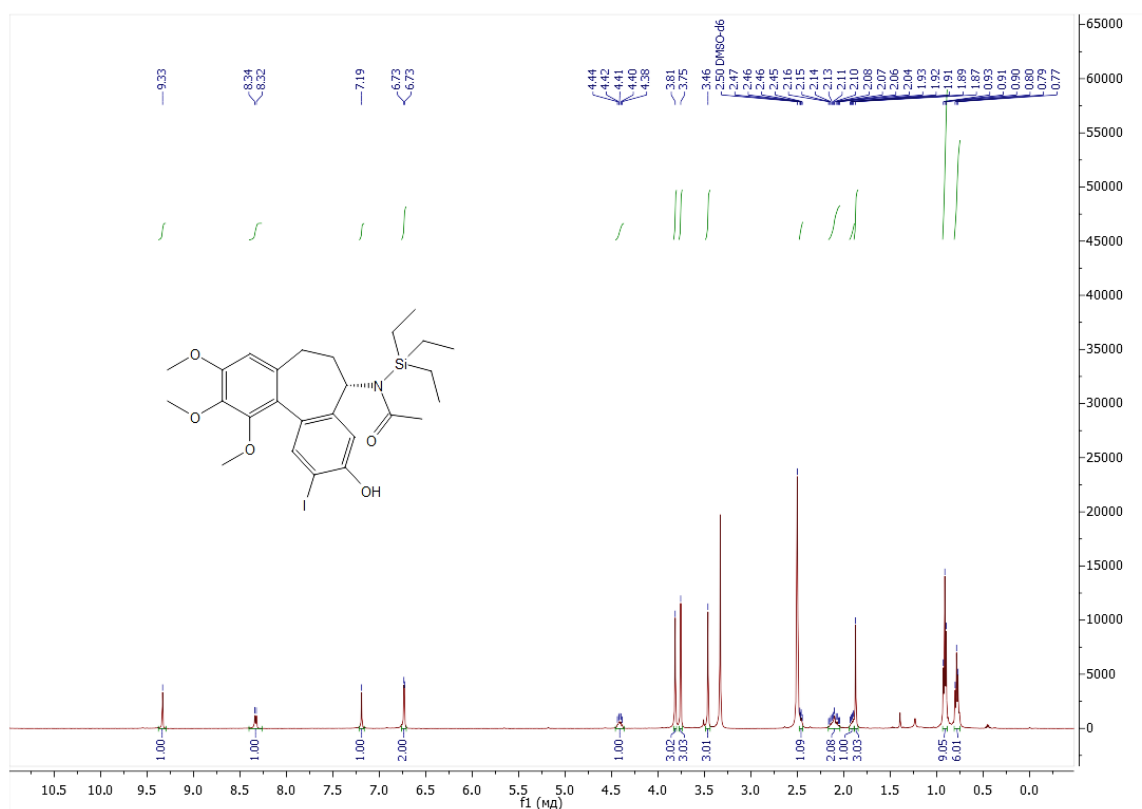

Figure S15. <sup>1</sup>H NMR (500 MHz, DMSO-*d*<sub>6</sub>) spectrum of compound **13**

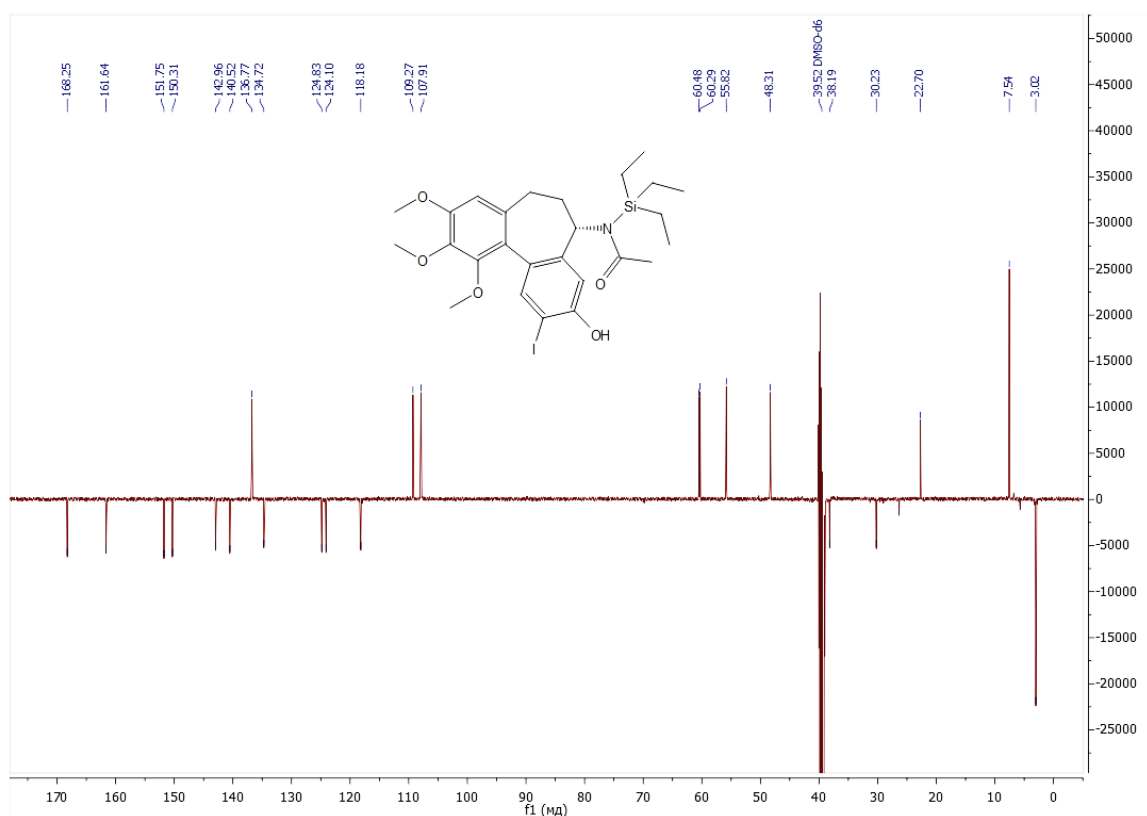

Figure S16. <sup>13</sup>C NMR (126 MHz, DMSO-*d*<sub>6</sub>) spectrum of compound **13**

***N*-((5*S*,11*aR*)-2-(*tert*-Butyldimethylsilyl)-3-hydroxy-9,10,11-trimethoxy-6,7-dihydro-5*H*-dibenzo[*a,c*]cyclohepten-5-yl)acetamide (**14**)**

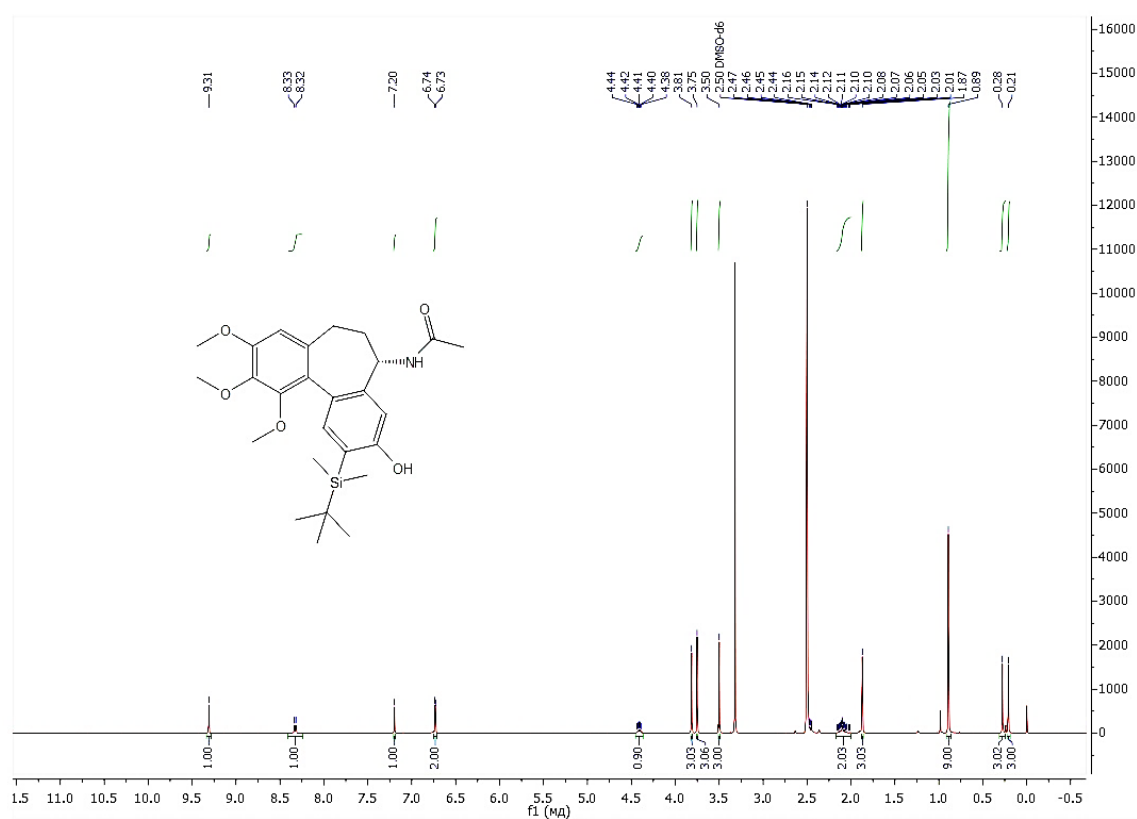

Figure S17.  $^1\text{H}$  NMR (500 MHz,  $\text{DMSO}-d_6$ ) spectrum of compound **14**

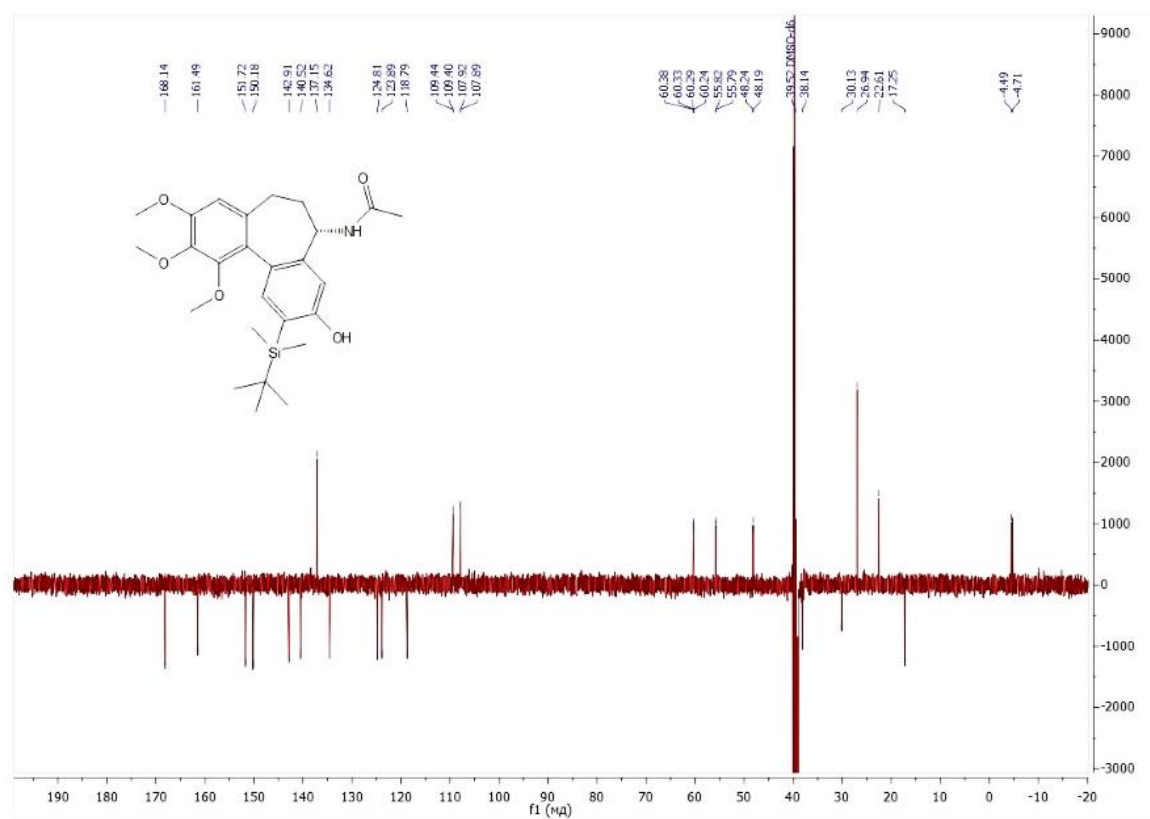

Figure S18.  $^{13}\text{C}$  NMR (126 MHz,  $\text{DMSO}-d_6$ ) spectrum of compound **14**

**(5*S*,11*aR*)-5-Acetamido-2-(*tert*-butyldimethylsilyl)-9,10,11-trimethoxy-6,7-dihydro-5*H*-dibenzo[*a,c*]cyclohepten-3-yl trifluoromethanesulfonate (**15**)**

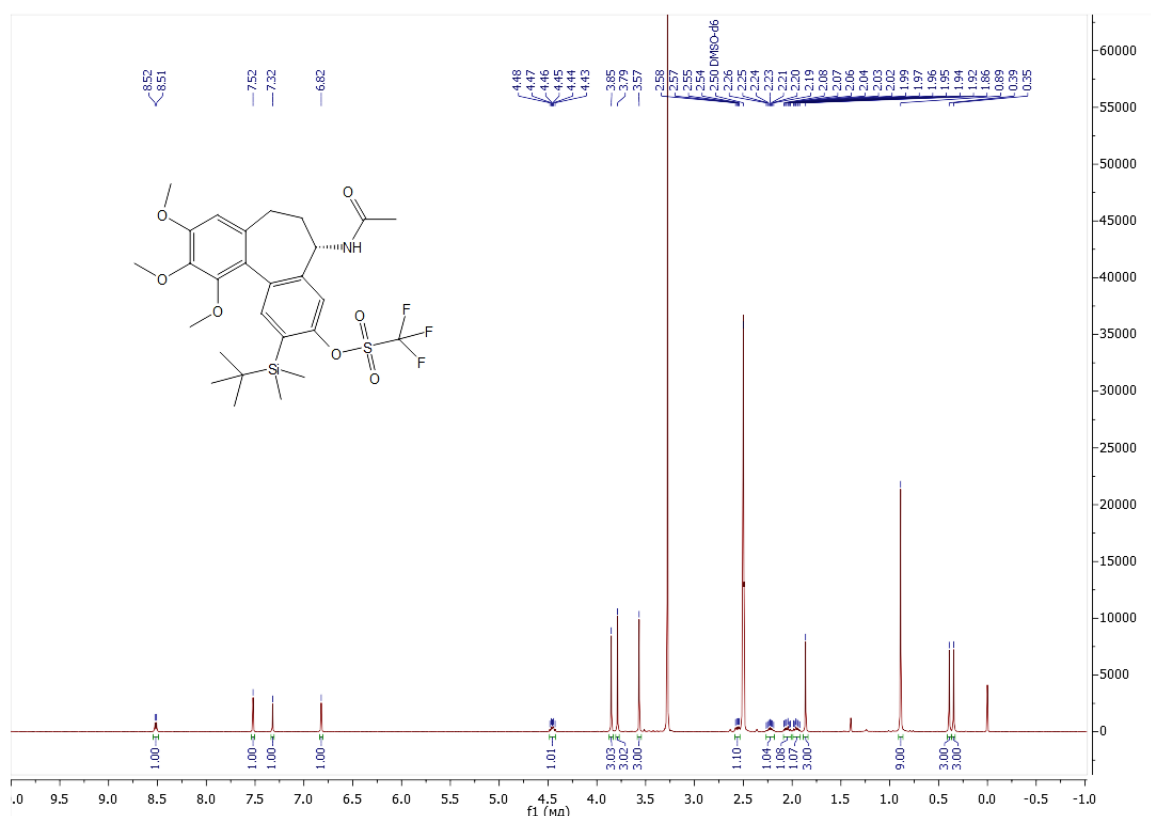

Figure S19.  $^1\text{H}$  NMR (500 MHz,  $\text{DMSO}-d_6$ ) spectrum of compound **15**

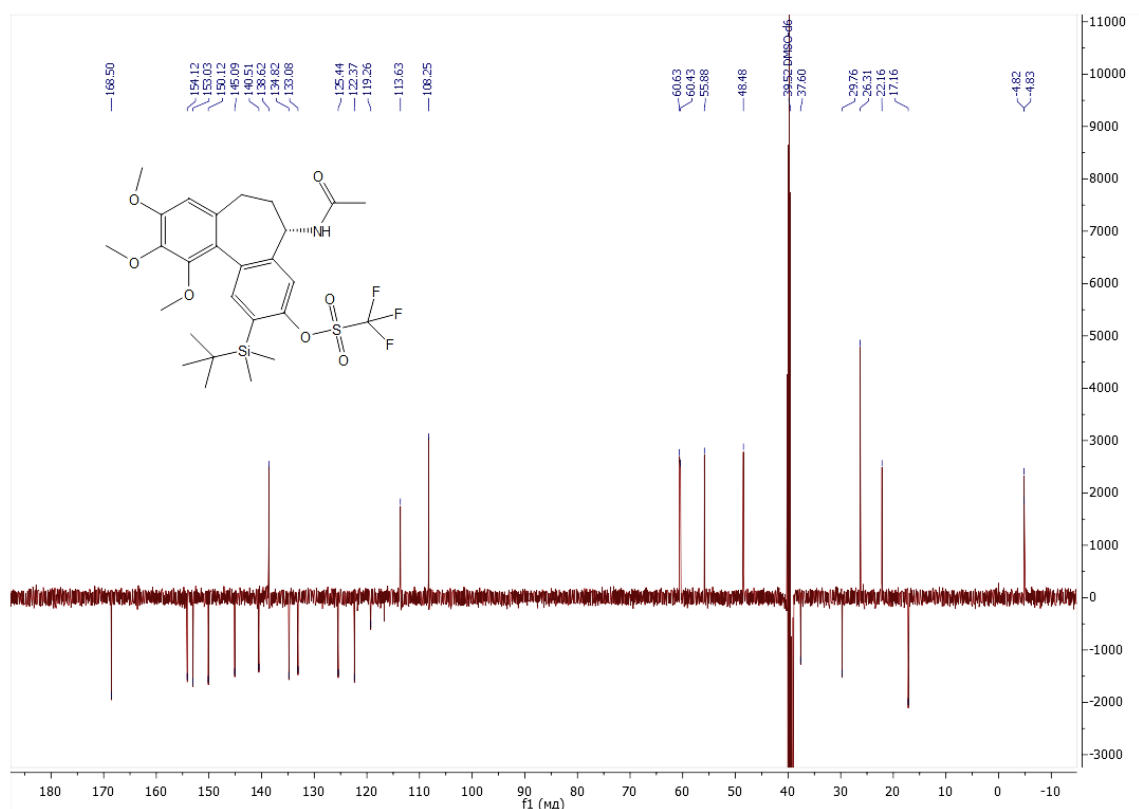

Figure S20.  $^{13}\text{C}$  NMR (126 MHz,  $\text{DMSO}-d_6$ ) spectrum of compound **15**

***N*-((7*S*)-9-Benzyl-1,2,3-trimethoxy-5,6,7,9-tetrahydrobenzo[3',4']cyclohepta[1',2':4,5]benzo[1,2-*d*][1,2,3]triazol-7-yl)acetamide (**16**)**

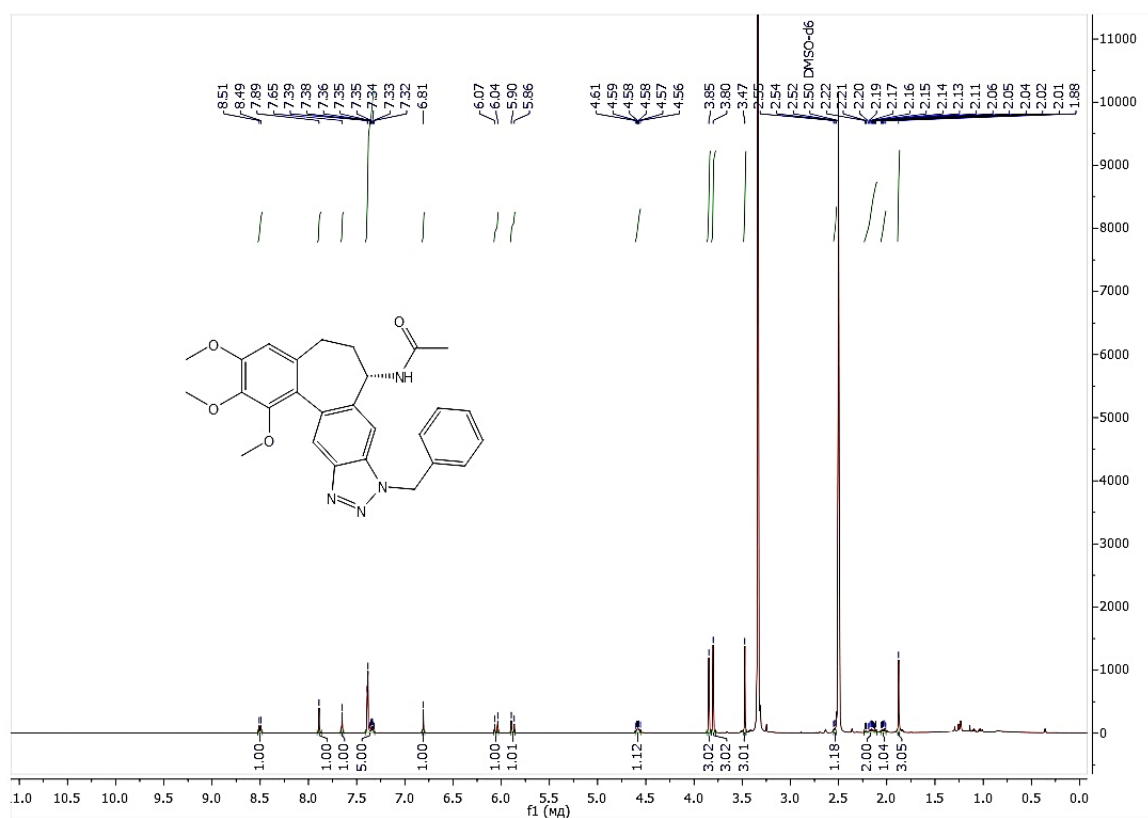

Figure S21. <sup>1</sup>H NMR (500 MHz, DMSO-*d*<sub>6</sub>) spectrum of compound **16**

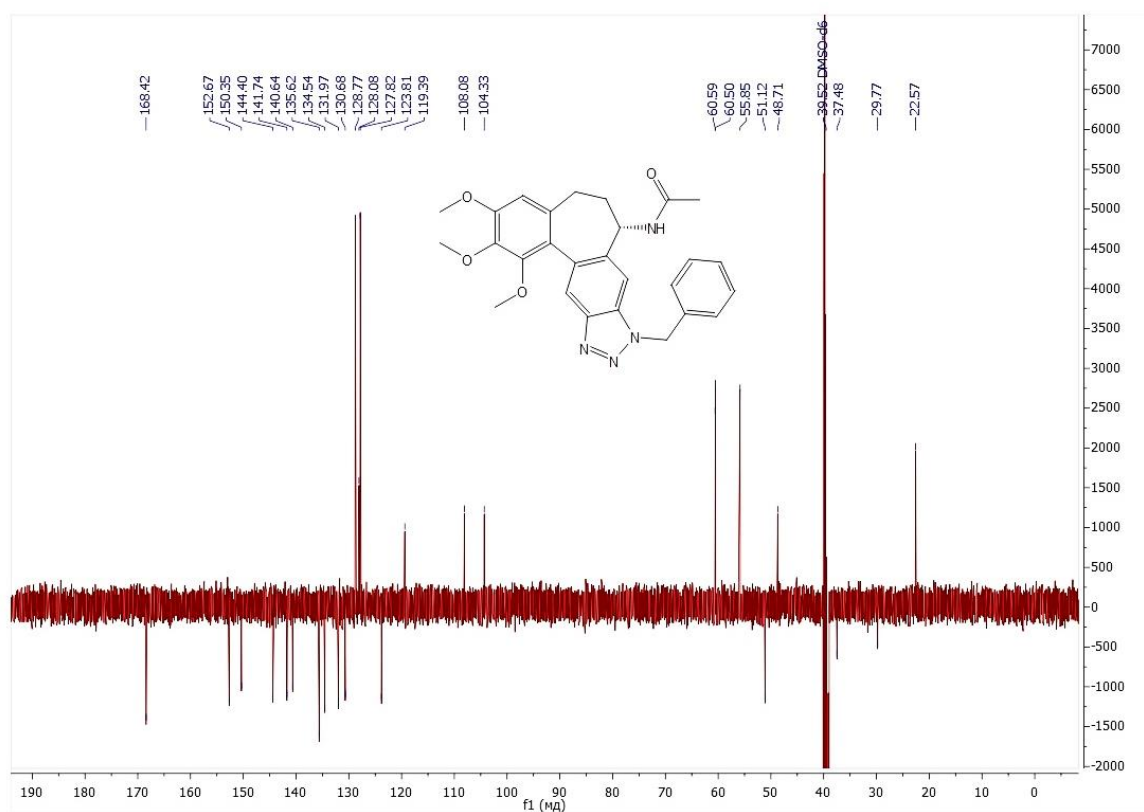

Figure S22. <sup>13</sup>C NMR (126 MHz, DMSO-*d*<sub>6</sub>) spectrum of compound **16**

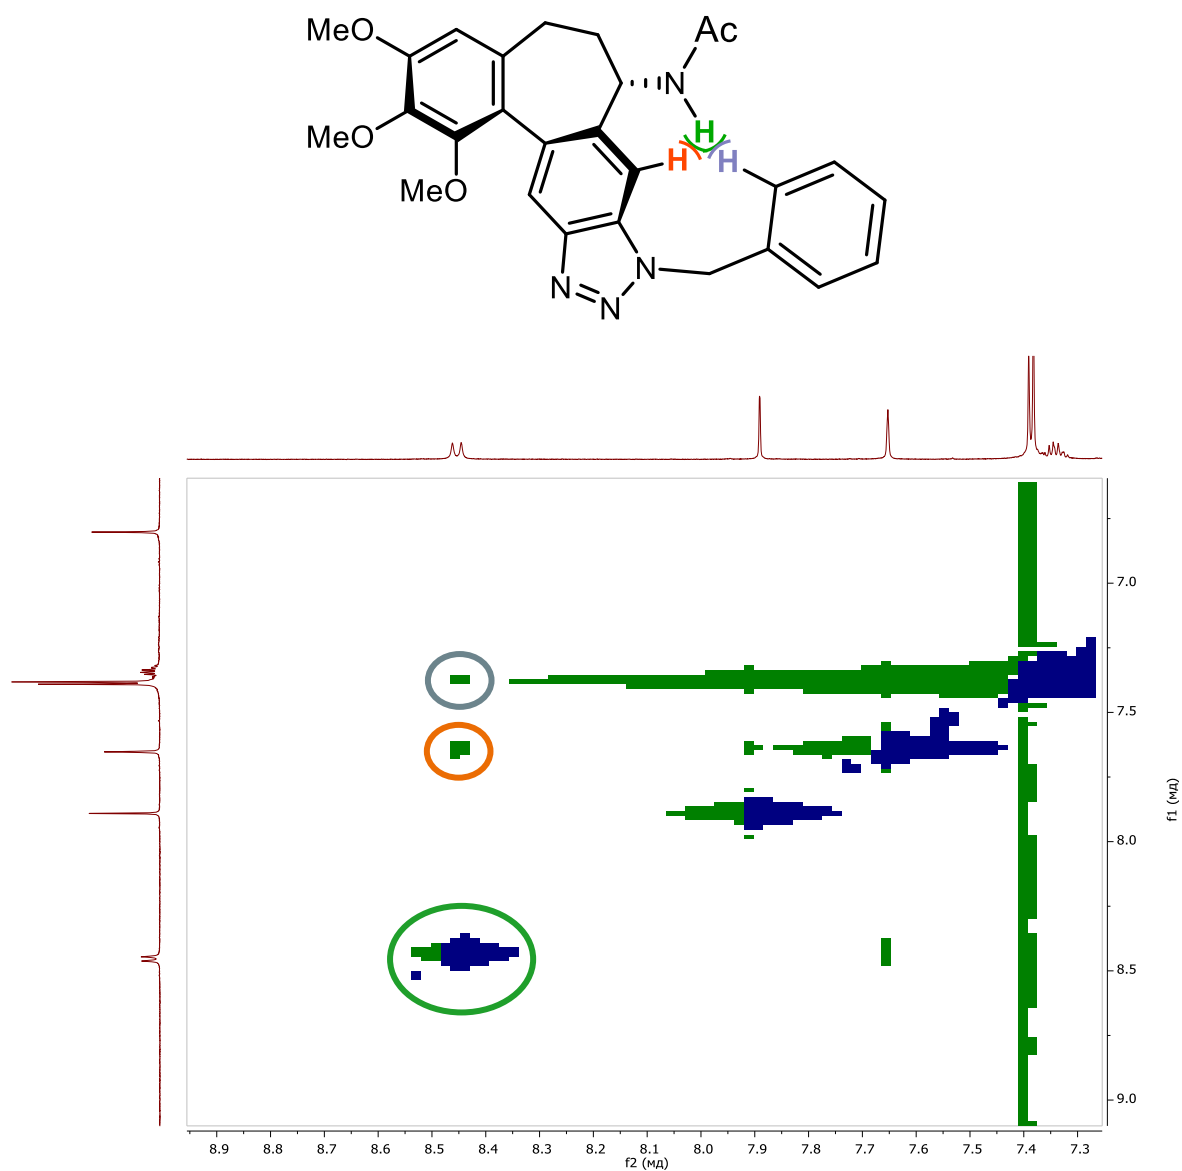

Figure S23. H,H-NOESY NMR (500 MHz, DMSO-*d*<sub>6</sub>) spectrum of compound **16**

***N*-((5*S*,11*aR*)-3-Hydroxy-9,10,11-trimethoxy-2-(trimethylsilyl)-6,7-dihydro-5*H*-dibenzo[*a,c*]cyclohepten-5-yl)acetamide (**17**)**

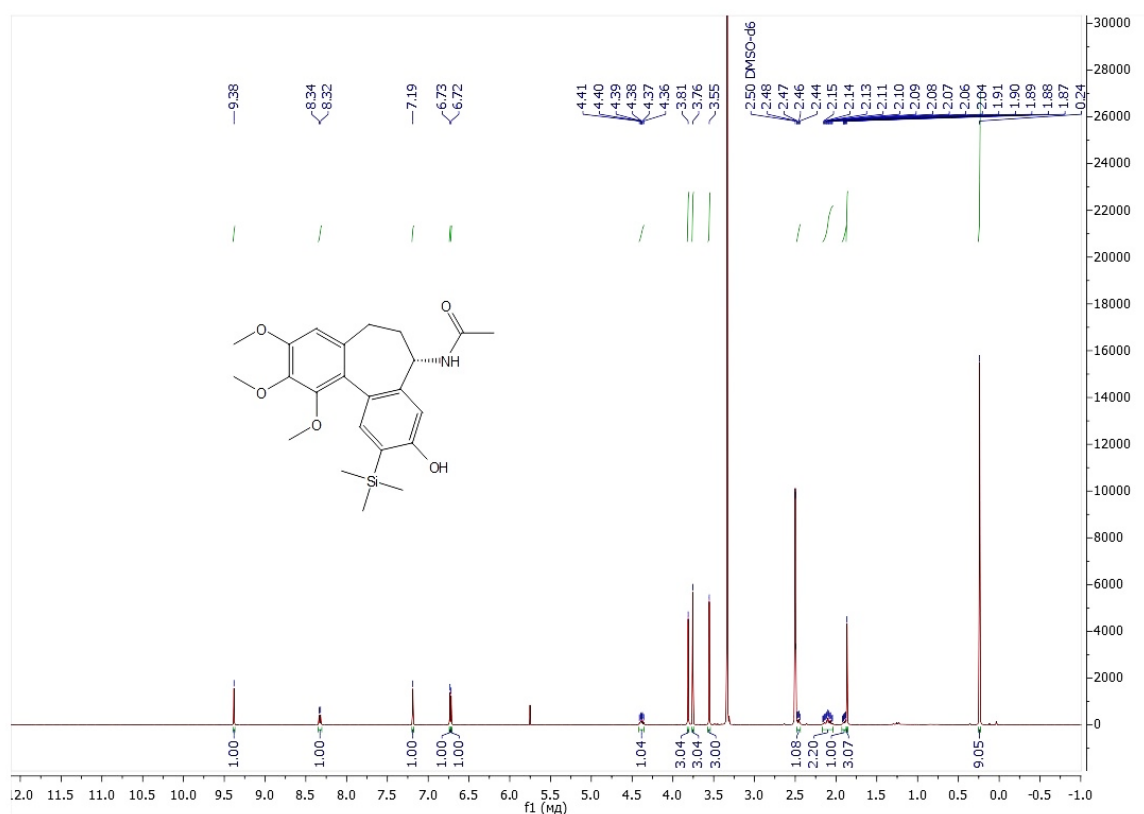

Figure S24. <sup>1</sup>H NMR (500 MHz, DMSO-*d*<sub>6</sub>) spectrum of compound **17**

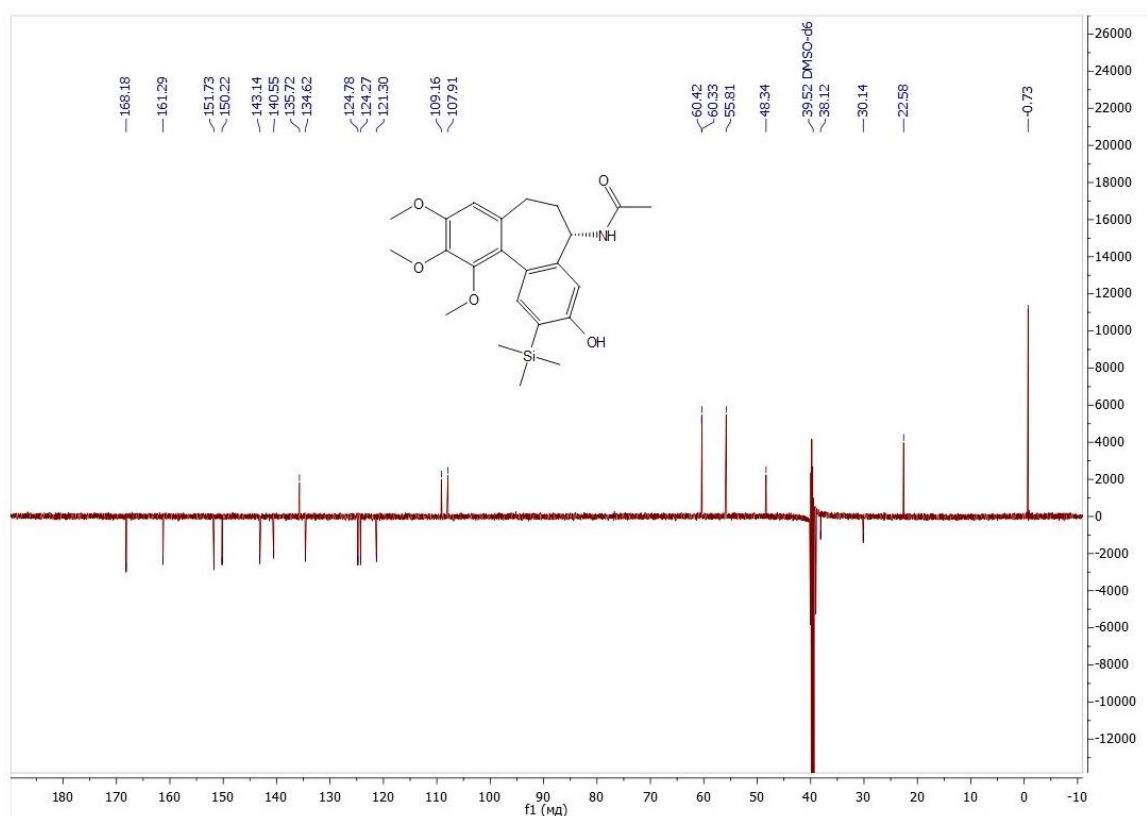

Figure S25. <sup>13</sup>C NMR (126 MHz, DMSO-*d*<sub>6</sub>) spectrum of compound **17**

***N*-((5*S*,11*aR*)-9,10,11-Trimethoxy-2-(trimethylsilyl)-3-((trimethylsilyl)oxy)-6,7-dihydro-5*H*-dibenzo[*a,c*]cyclohepten-5-yl)acetamide (18)**

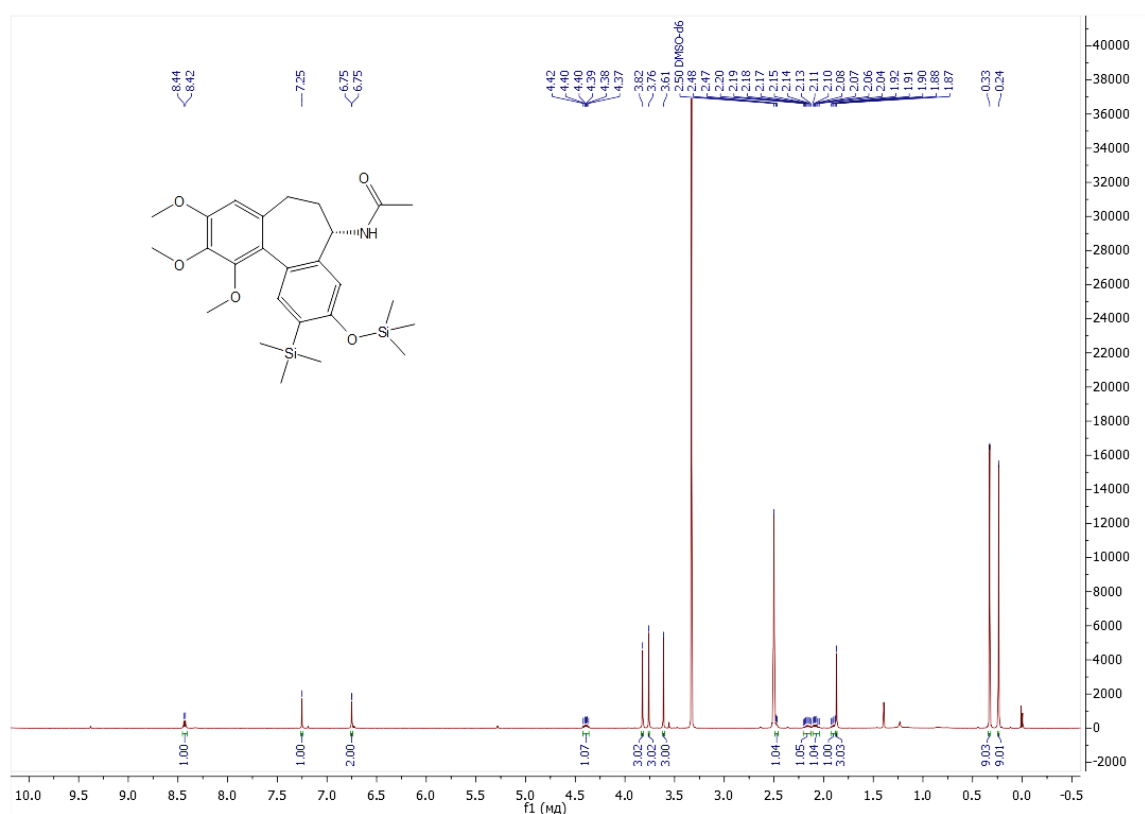

Figure S26.  $^1\text{H}$  NMR (500 MHz,  $\text{DMSO}-d_6$ ) spectrum of compound **18**

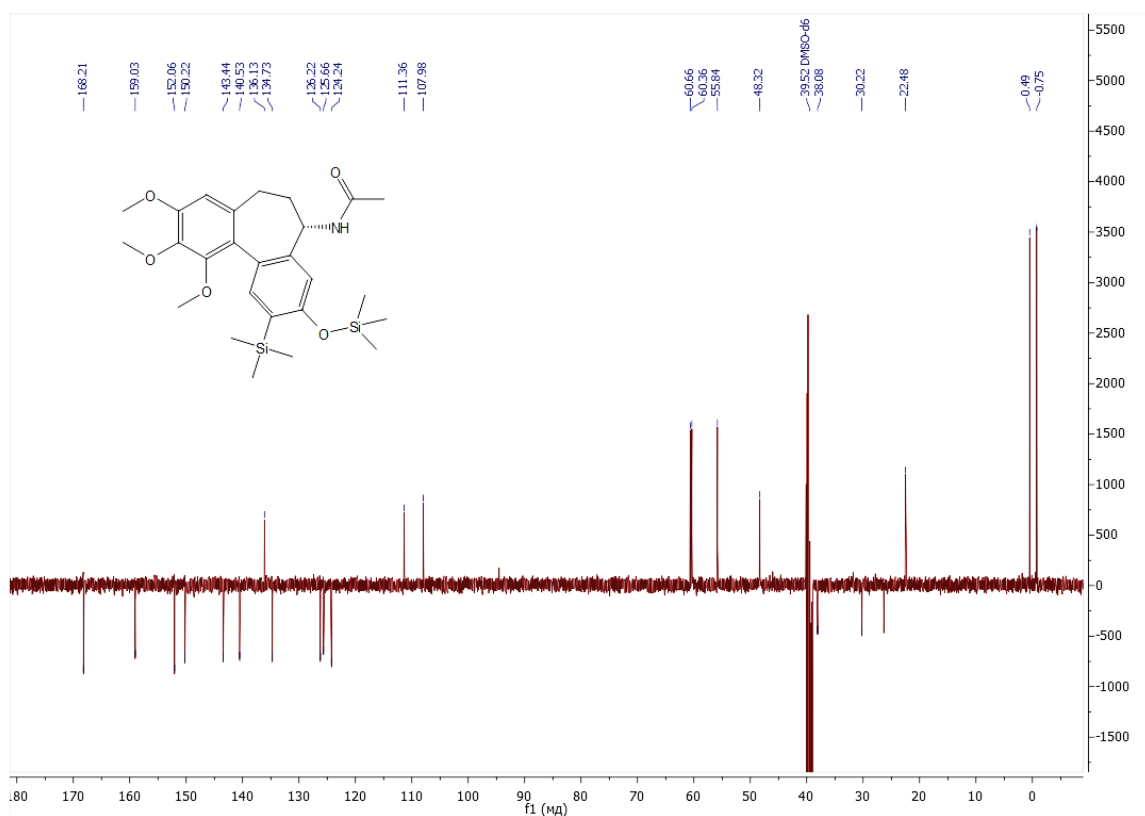

Figure S27.  $^{13}\text{C}$  NMR (126 MHz,  $\text{DMSO}-d_6$ ) spectrum of compound **18**

***N*-((7*S*,13*bR*)-1,2,3-Trimethoxy-6,7,9,12-tetrahydro-5*H*-9,12-epoxybenzo[3,4]cyclohepta[1,2-*b*]naphthalen-7-yl)acetamide (**19**)**

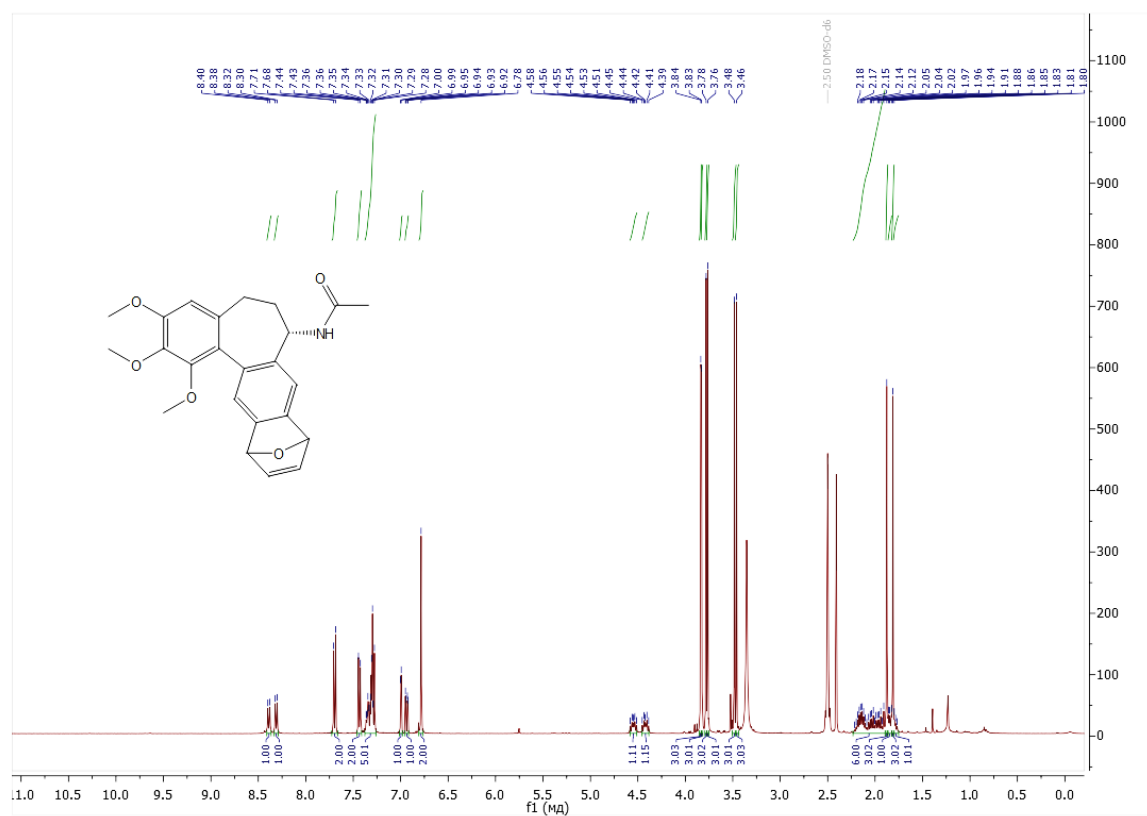

Figure S28.  $^1\text{H}$  NMR (400 MHz,  $\text{DMSO}-d_6$ ) spectrum of compound **19**

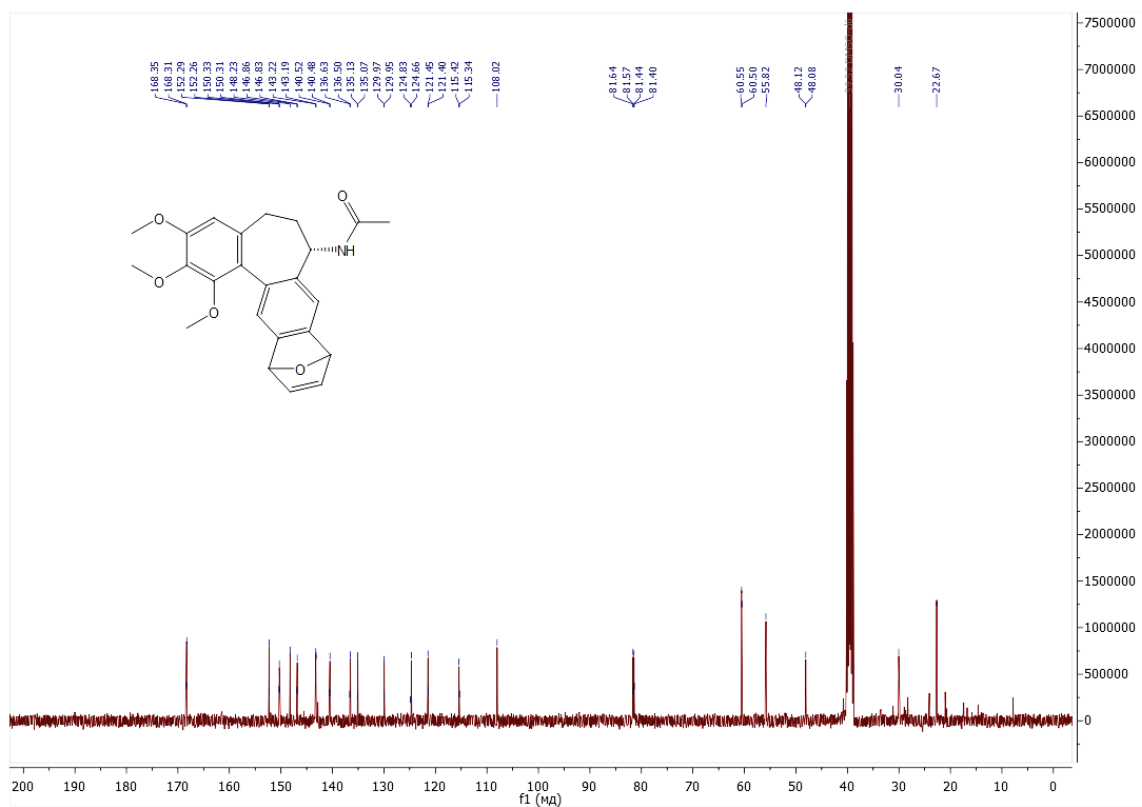

Figure S29.  $^{13}\text{C}$  NMR (101 MHz,  $\text{DMSO}-d_6$ ) spectrum of compound **19**



***N*-((7*S*,14*bR*)-1,2,3-Trimethoxy-10,13-dimethyl-9-oxo-5,6,7,9,10,11,12,13-octahydrobenzo[3',4']cyclohepta[1',2':4,5]benzo[1,2-*e*][1,4]diazepin-7-yl)acetamide (**20**)**

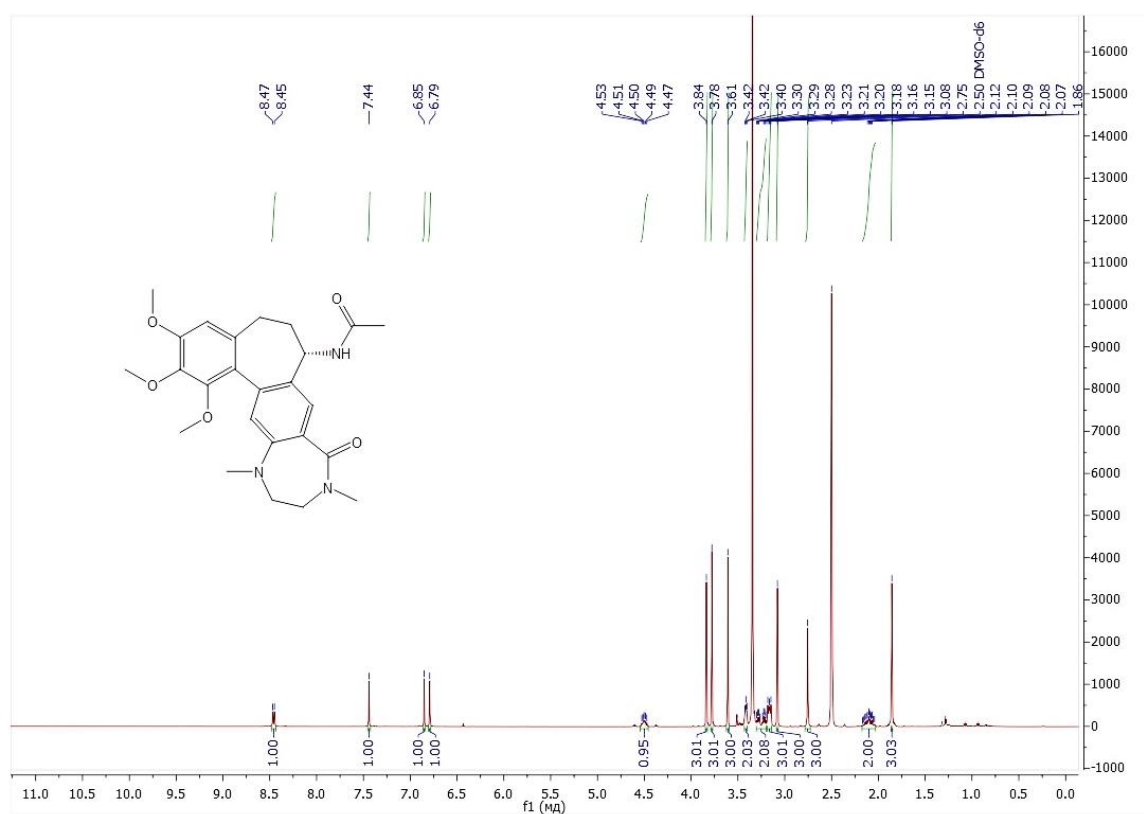

Figure S30.  $^1\text{H}$  NMR (500 MHz,  $\text{DMSO}-d_6$ ) spectrum of compound **20**

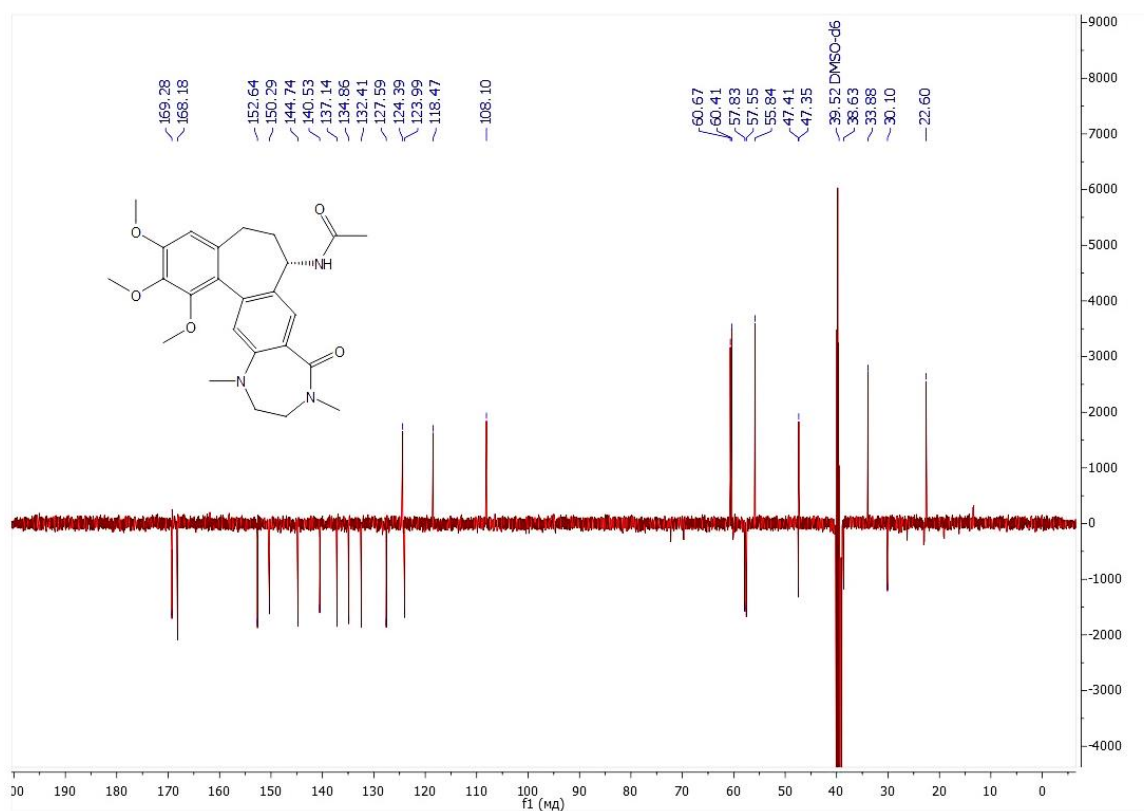

Figure S31.  $^{13}\text{C}$  NMR (126 MHz,  $\text{DMSO}-d_6$ ) spectrum of compound **20**

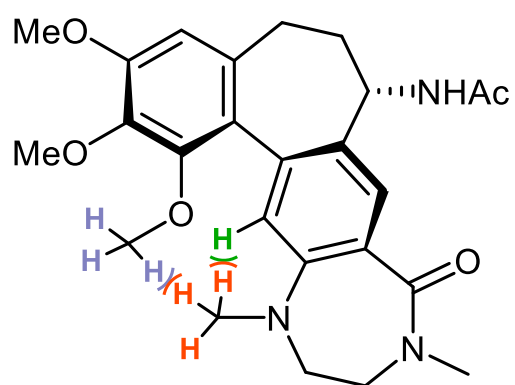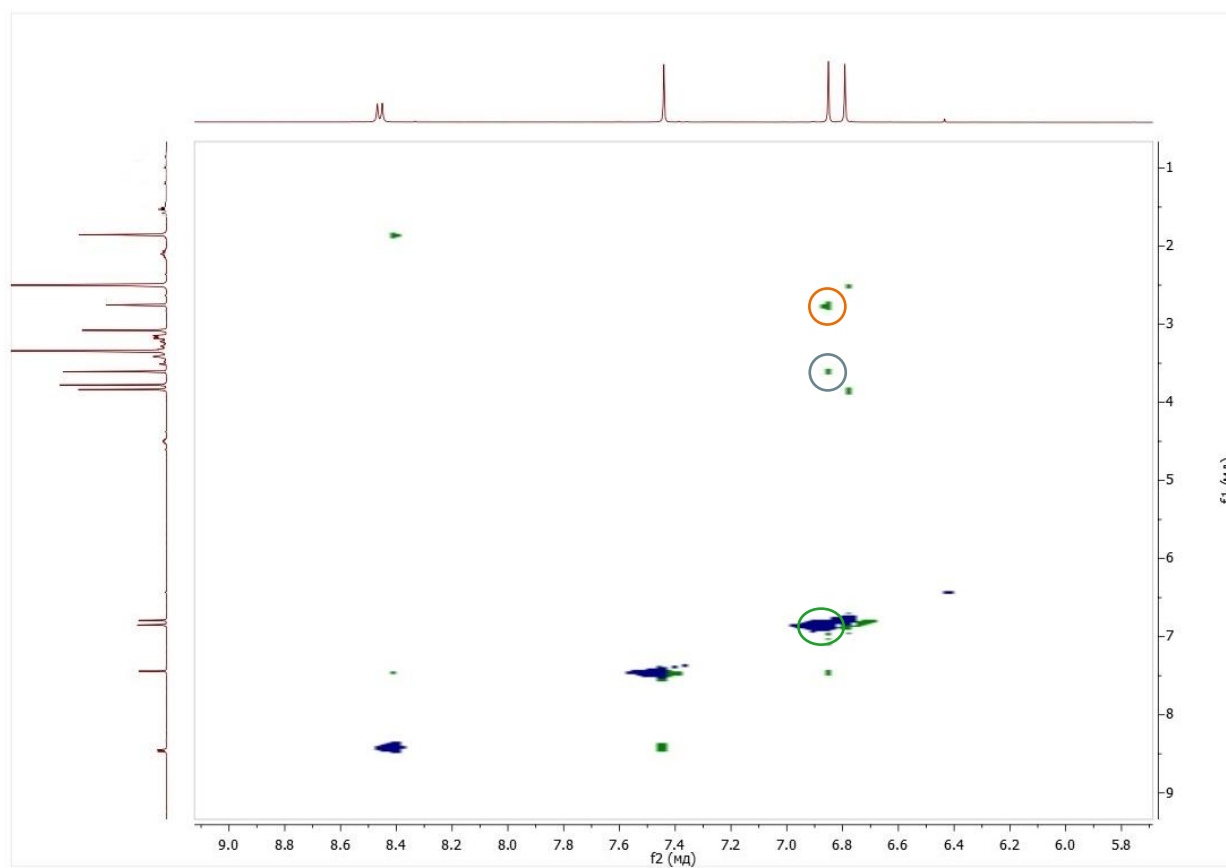

Figure S32. H,H-NOESY NMR (500 MHz, DMSO- $d_6$ ) spectrum of compound **20**

**Ethyl (7S)-7-acetamido-1,2,3-trimethoxy-5,6,7,11-tetrahydrobenzo[3,4]cyclohepta[1,2-f]indazole-9-carboxylate (21)**

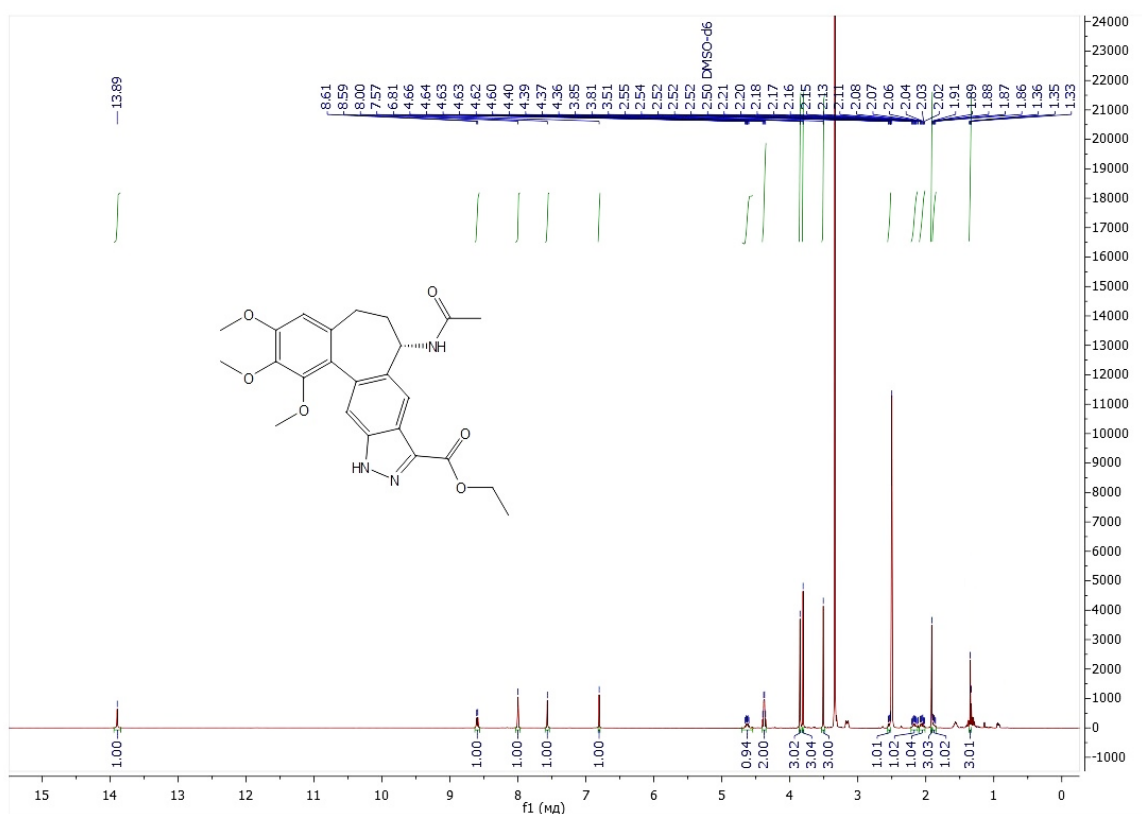

Figure S33. <sup>1</sup>H NMR (500 MHz, DMSO-*d*<sub>6</sub>) spectrum of compound 21

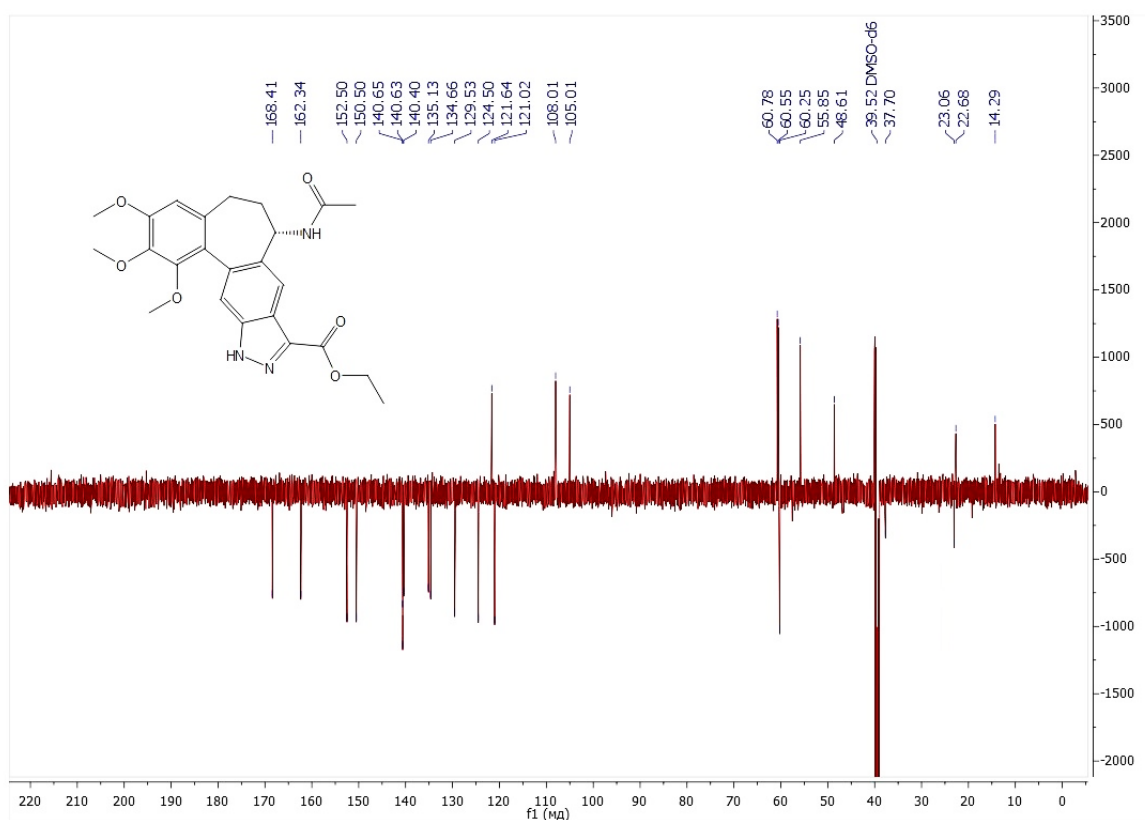

Figure S34. <sup>13</sup>C NMR (126 MHz, DMSO-*d*<sub>6</sub>) spectrum of compound 21

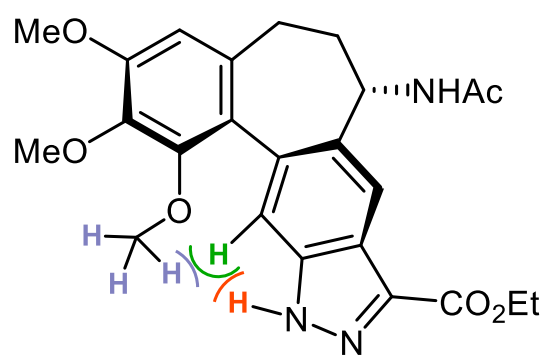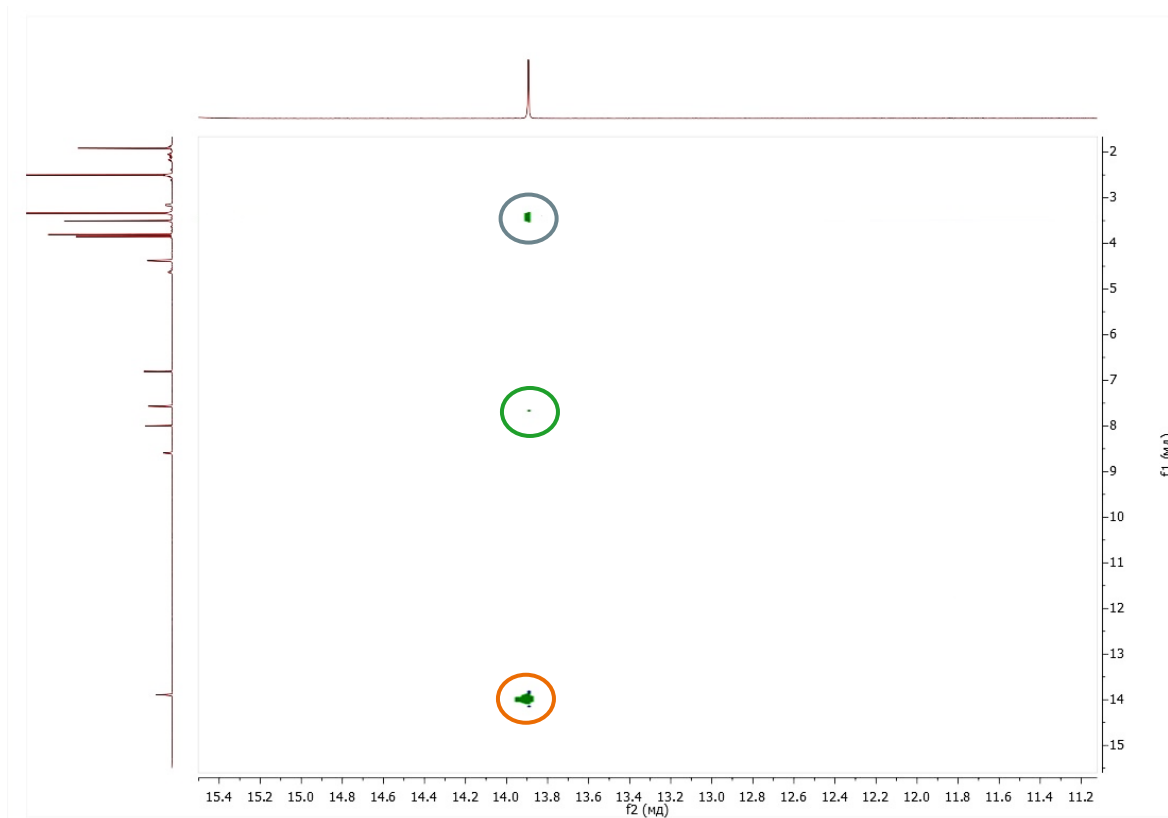

Figure S35. H,H-NOESY NMR (500 MHz, DMSO-*d*<sub>6</sub>) spectrum of compound **21**
